# Supplementary material for: Mechanistic insights into hydrogen generation for catalytic hydrolysis and alcoholysis of silanes with high-valent oxorhenium(v) complexes
Source: Royal Society of Chemistry journal article supplement (doi:10.1039/c4cy01259c), 2015-01-01
Supplement: c4cy01259c1.pdf [file c4cy01259c1.pdf]

### Supporting Information

#### Mechanistic insights into hydrogen generation for catalytic hydrolysis and alcoholysis of silanes with high-valent oxorhenium(V) Complexes

1. Complete reference of 45.
2. Figure S1. The optimized structure of adducts **2trans** + H<sub>2</sub>O-*anti*. **TS2**, **TS[2+2]** and **Int[2+2]**. Bond distances are shown in Å.
3. Figure S2. The optimized geometries of the ionic transition states **TS4anti** and the intermediates **4anti** with various alcohols, including CH<sub>3</sub>OH, CH<sub>3</sub>CH<sub>2</sub>OH and t-BuOH for the oxorhenium(V) complex (**1**)-catalyzed the alcoholysis reactions.
4. Figure S3. The optimized structures of the ionic transition states **TS4anti** and the intermediates **4anti** with a varieties of silanes, including EtMe<sub>2</sub>SiH, Et<sub>2</sub>MeSiH, Et<sub>3</sub>SiH, PhMe<sub>2</sub>SiH, Ph<sub>2</sub>MeSiH, Ph<sub>3</sub>SiH and BuMe<sub>2</sub>SiH for the oxorhenium(V) complex (**1**)-catalyzed the hydrolysis reactions.
5. Figure S4. Optimized structures of the transition states **TS4anti-PhOH**, **TS5-PhOH** and the intermediates **4anti-PhOH**, **4syn-PhOH** in oxorhenium(V) complex (**1**)-catalyzed the alcoholysis of phenol via the ionic mechanistic pathway.
6. Figure S5. Schematic free-energy surface (B3LYP) for the cationic high-valent oxorhenium complex [Re(O)(hoz)<sub>2</sub>]<sup>+</sup> (**1**) catalyzed the hydrolysis (black) and alcoholysis (blue) of silanes along the ionic mechanistic pathway.
7. Table S1. The calculated free energies of key intermediates and transition states at B3LYP and B3LYP-D levels of theory are listed for the oxorhenium(V) complex (**1**) catalyzing the hydrosilylation.
8. Figure S6. Isomers of η<sup>1</sup>-silane-rhenium(V) adduct: **2trans-2**, **2cis-2**, **2cis-3**, **2cis-4** (with ΔG (optimized in gas-phase) in the parenthesis, **2trans** is set to zero).
9. Figure S7. The energy plot versus d(H⋯Si) or d(Si⋯O(OH)) for searching the transition state **TS8trans**, **TS8cis** from complex **2trans+OH** or **2cis+OH** (note: Taking Si⋯O(OH) separation as the reaction coordinate, the search for transition state in such an arrangement has been unsuccessful. The energy plot versus d(Si⋯O(OH)) went uphill, till to obtain the dissociative neutral rhenium hydride species (**1Htrans**) and the solvated Me<sub>3</sub>SiOH<sup>+</sup> ion.
10. Figure S8. The energy plot versus d(H⋯Si) for searching the transition state **TS9** and the rhenium(VII) intermediate **9** from complex **2trans** or **2cis** (note: Taking H⋯Si separation as the reaction coordinate, the search for transition state in such an arrangement has been unsuccessful. The energy plot versus d(H⋯Si) goes uphill.
11. Figure S9. The energy plot versus d(H⋯Si) for searching the transition state **TS10** and the rhenium(VII) intermediate **10-2** from silane-rhenium complex **10** (note: Taking H⋯Si separation as the reaction coordinate, the search for transition state in such an arrangement has been unsuccessful. The energy plot versus d(H⋯Si) goes uphill.
12. Equation 1 Two reactions for generation of **1Htrans/1Hcis** and **1-OHtrans/1OH-cis** with B (C<sub>6</sub>F<sub>5</sub>)<sub>4</sub><sup>-</sup>.
13. Table S2. Cartesian coordinates for all optimized structures in XYZ format.

**Complete reference of 45.**

Frisch, M. J. et al. *Gaussian 09*; Gaussian, Inc. Frisch, M. J.; Trucks, G. W.; Schlegel, H. B.; Scuseria, G. E.; Robb, M. A.; Cheeseman, J. R.; Montgomery, Jr., J. A.; Vreven, T.; Kudin, K. N.; Burant, J. C.; Millam, J. M.; Iyengar, S. S.; Tomasi, J.; Barone, V.; Mennucci, B.; Cossi, M.; Scalmani, G.; Rega, N.; Petersson, G. A.; Nakatsuji, H.; Hada, M.; Ehara, M.; Toyota, K.; Fukuda, R.; Hasegawa, J.; Ishida, M.; Nakajima, T.; Honda, Y.; Kitao, O.; Nakai, H.; Klene, M.; Li, X.; Knox, J. E.; Hratchian, H. P.; Cross, J. B.; Bakken, V.; Adamo, C.; Jaramillo, J.; Gomperts, R.; Stratmann, R. E.; Yazyev, O.; Austin, A. J.; Cammi, R.; Pomelli, C.; Ochterski, J. W.; Ayala, P. Y.; Morokuma, K.; Voth, G. A.; Salvador, P.; Dannenberg, J. J.; Zakrzewski, V. G.; Dapprich, S.; Daniels, A. D.; Strain, M. C.; Farkas, O.; Malick, D. K.; Rabuck, A. D.; Raghavachari, K.; Foresman, J. B.; Ortiz, J. V.; Cui, Q.; Baboul, A. G.; Clifford, S.; Cioslowski, J.; Stefanov, B. B.; Liu, G.; Liashenko, A.; Piskorz, P.; Komaromi, I.; Martin, R. L.; Fox, D. J.; Keith, T.; Al-Laham, M. A.; Peng, C. Y.; Nanayakkara, A.; Challacombe, M.; Gill, P. M. W.; Johnson, B.; Chen, W.; Wong, M. W.; Gonzalez, C.; and Pople, J. A.; Gaussian, Inc., Pittsburgh PA,, 2009.

**Figure S1.** The optimized structure of adducts *2trans* + H<sub>2</sub>O-*anti*, TS2, TS[2+2] and Int[2+2]. Bond distances are shown in Å.

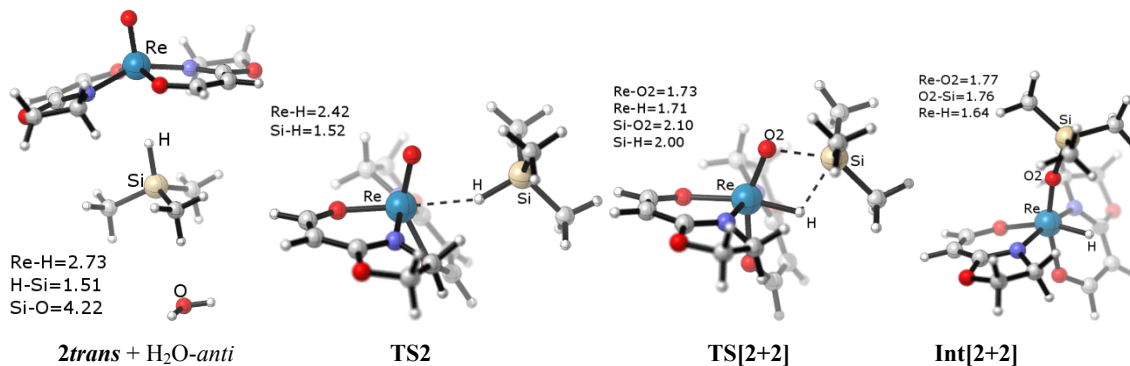

**Figure S2.** The optimized geometries of the ionic transition states TS4*anti* and the intermediates 4*anti* with various alcohols, including CH<sub>3</sub>OH, CH<sub>3</sub>CH<sub>2</sub>OH and t-BuOH for the oxorhenium(V) complex (1)-catalyzed the alcoholysis reactions.

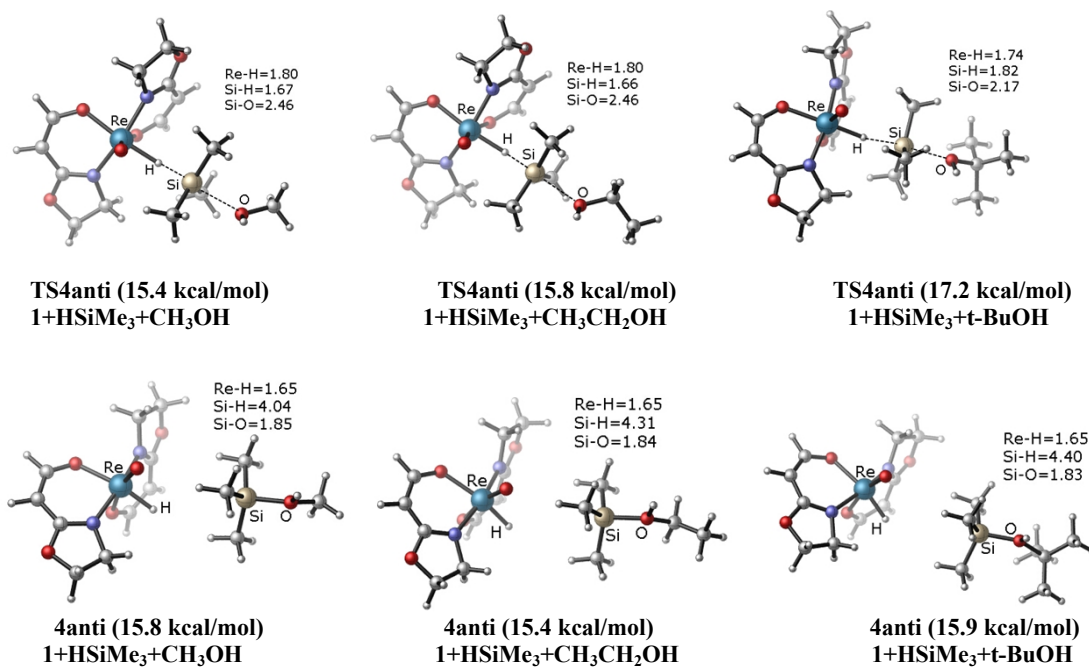

**Figure S3.** The optimized structures of the ionic transition states TS4anti and the intermediates 4anti with a varieties of silanes, including EtMe<sub>2</sub>SiH, Et<sub>2</sub>MeSiH, Et<sub>3</sub>SiH, PhMe<sub>2</sub>SiH, Ph<sub>2</sub>MeSiH, Ph<sub>3</sub>SiH and BuMe<sub>2</sub>SiH for the oxorhenium(V) complex (1)-catalyzed the hydrolysis reactions. Bond distances are shown in Å.

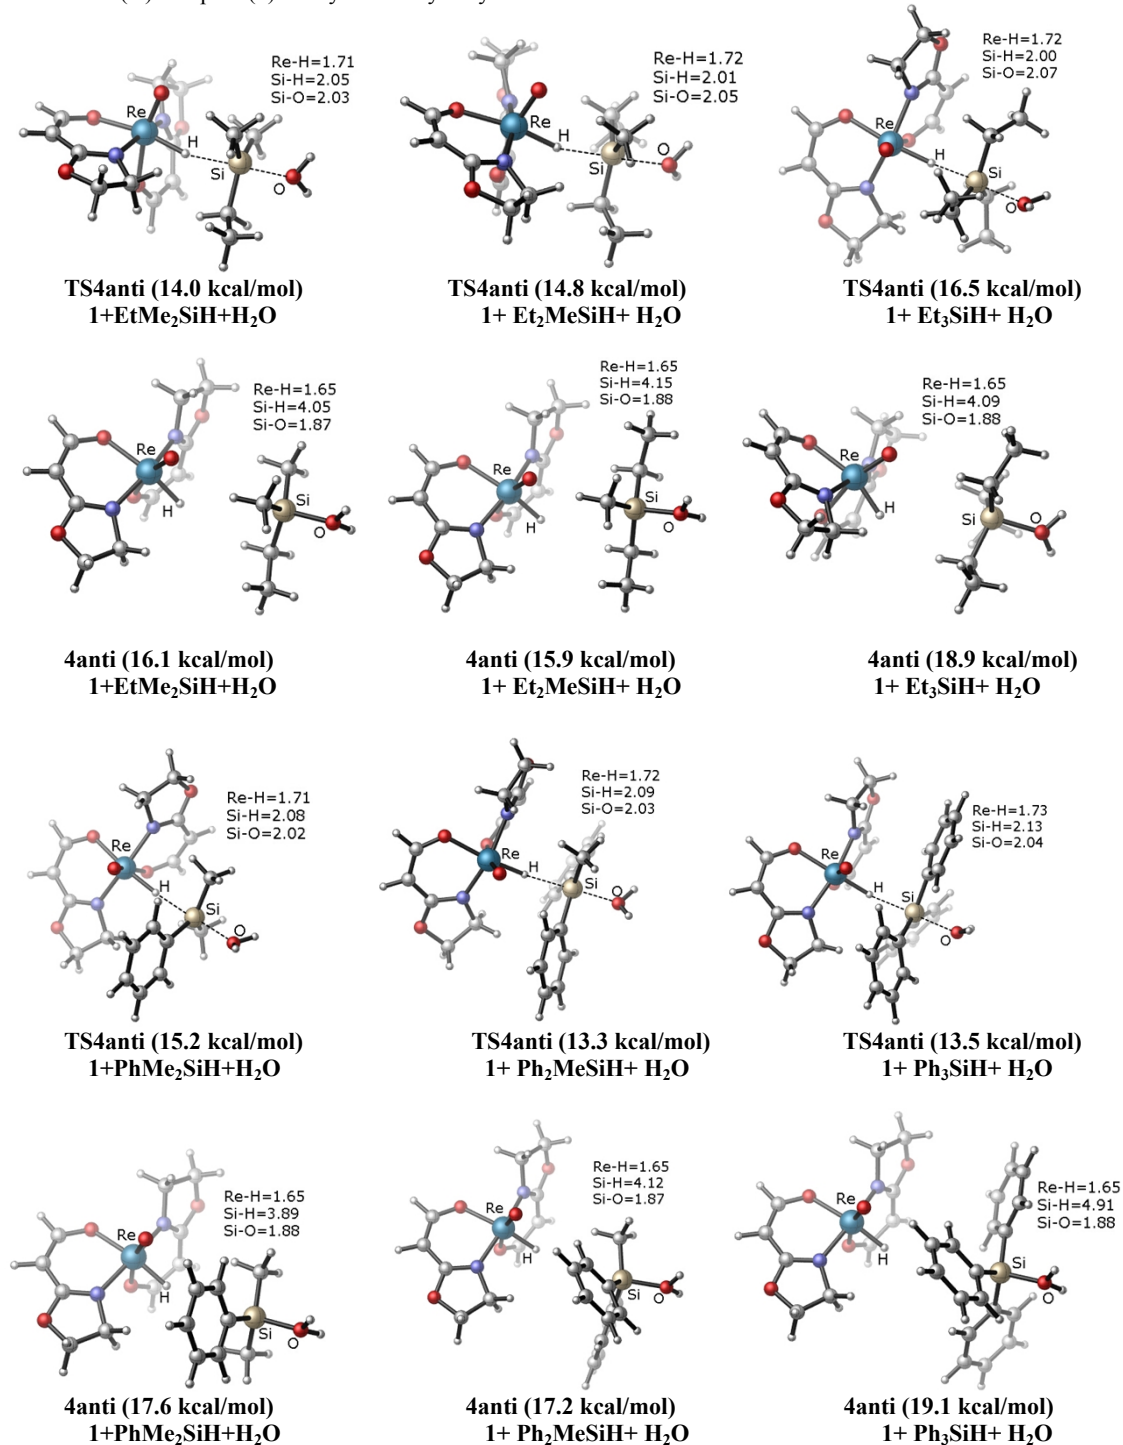

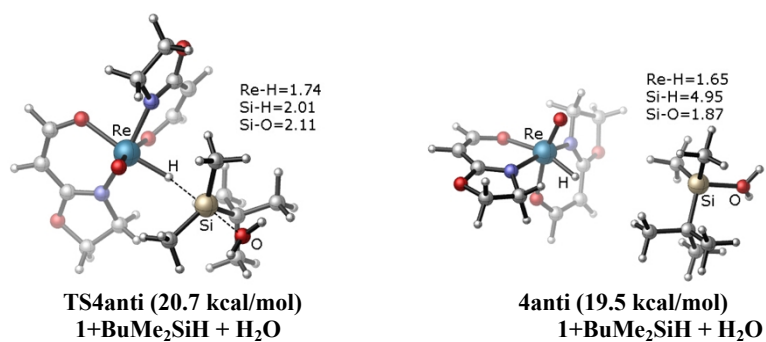

**Figure S4.** Optimized structures of the transition states **TS4anti-PhOH**, **TS5-PhOH** and the intermediates **4anti-PhOH**, **4syn-PhOH** in oxorhenium(V) complex (**1**)-catalyzed the alcoholysis of phenol via the ionic mechanistic pathway. Bond distances are shown in Å.

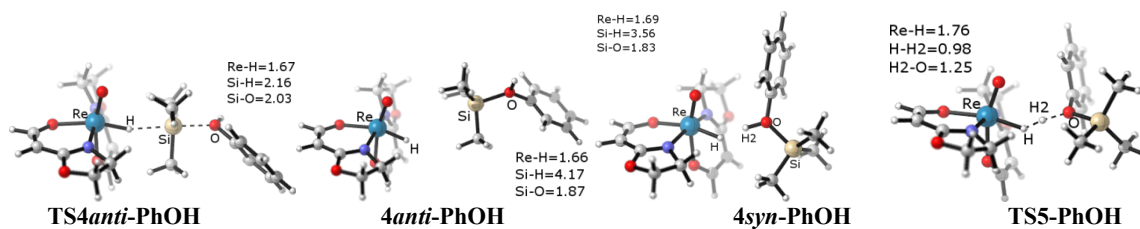

**Figure S5.** Schematic free-energy surface (B3LYP level) for the cationic high-valent oxorhenium complex  $[\text{Re}(\text{O})(\text{hoz})_2]^+$  (**1**) catalyzed the hydrolysis (black) and alcoholysis (blue) of silanes along the ionic mechanistic pathway.

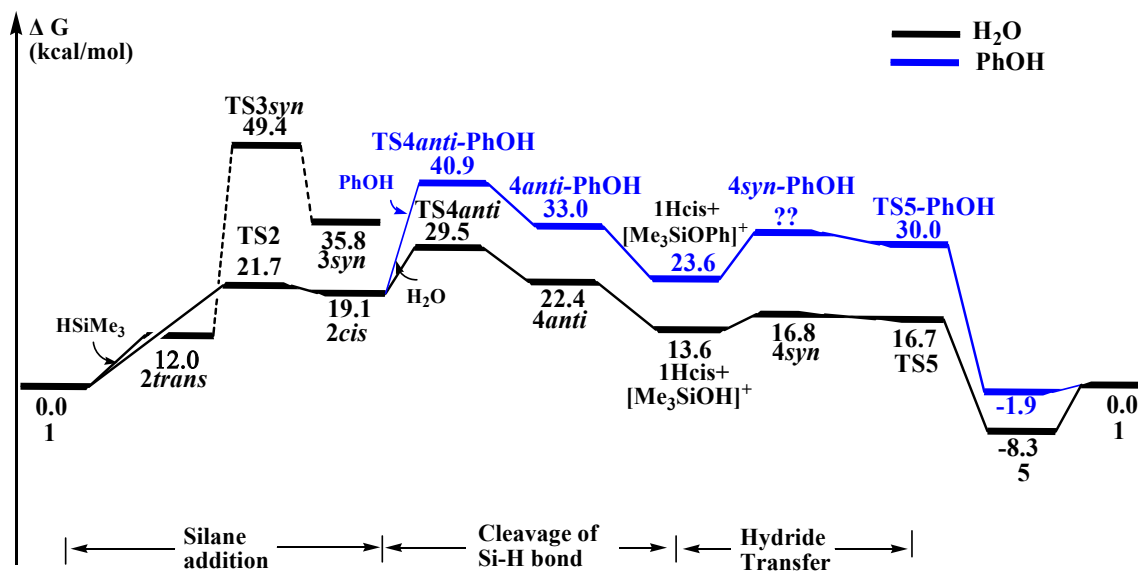

**Table S1** The calculated free energies of key intermediates and transition states at B3LYP and B3LYP-D levels of theory are listed for oxorhenium(V) complex (**1**) catalyzing the hydrosilylation. (a---H<sub>2</sub>O, b---PhOH)

|                            | SMD//B3LYP<br>6-311G(d,p)<br>Lan2L2DZ | SMD//B3LYP-D<br>6-311G(d,p)<br>Lan2L2DZ |
|----------------------------|---------------------------------------|-----------------------------------------|
| <b>1</b>                   | 0.0                                   | 0.0                                     |
| <b>2trans</b>              | 12.0                                  | 3.5                                     |
| <b>TS2</b>                 | 21.7                                  | 13.2                                    |
| <b>2cis</b>                | 19.1                                  | 10.0                                    |
| <b>TS4anti<sup>a</sup></b> | 29.5                                  | 15.7                                    |
| <b>4anti</b>               | 22.4                                  | 17.2                                    |
| <b>TS4syn</b>              | 45.1                                  | 31.8                                    |
| <b>4syn</b>                | 16.8                                  | 13.8                                    |
| <b>TS5</b>                 | 16.7                                  | 8.7                                     |
| <b>5</b>                   | -8.3                                  | -10.8                                   |
| <b>TS4anti<sup>b</sup></b> | 40.9                                  | 23.9                                    |
| <b>4anti</b>               | 33.0                                  | 25.0                                    |
| <b>TS4syn</b>              | 55.2                                  | 37.3                                    |
| <b>TS5</b>                 | 30.0                                  | 13.7                                    |
| <b>5</b>                   | -1.9                                  | -7.5                                    |
| <b>TS3syn<sup>a</sup></b>  | 49.4                                  | 34.4                                    |
| <b>3syn</b>                | 35.8                                  | 28.2                                    |

**Figure S6.** Isomers of  $\eta^1$ -silane-rhenium(V) adduct: *2trans*-2, *2cis*-2, *2cis*-3, *2cis*-4 (with  $\Delta G$  (optimized in the gas-phase) in the parenthesis, *2trans* is set to zero).

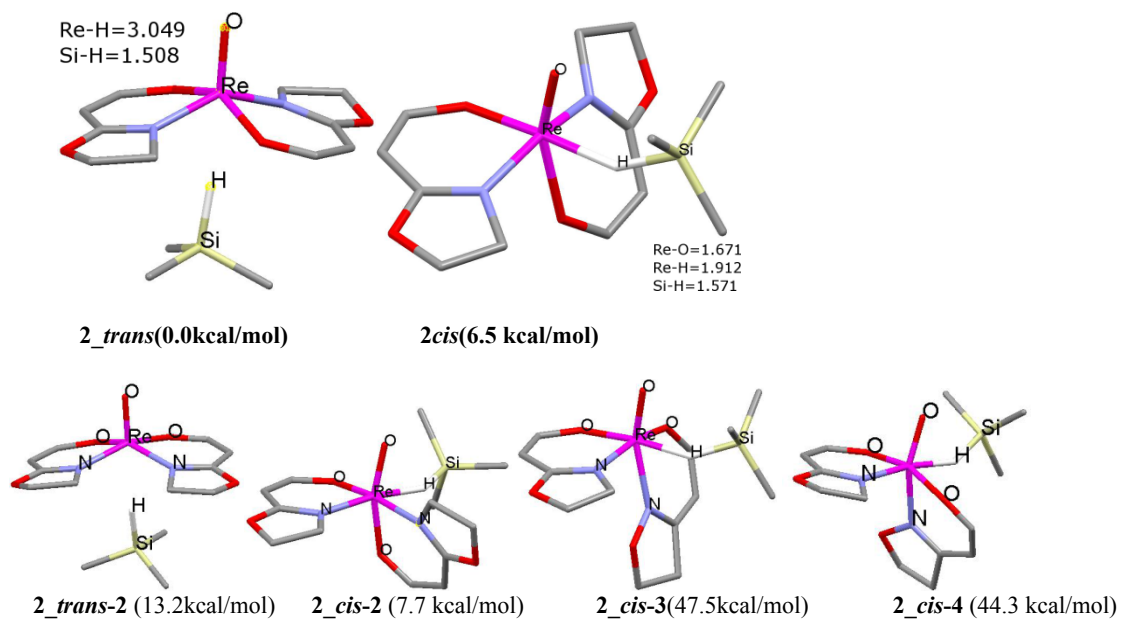

**Figure S7.** The energy plot versus  $d(\text{Si}\cdots\text{O}(\text{OH}))$  for searching the transition state *TS8trans*, *TS8cis* from complex *2trans*+OH or *2cis*+OH (note: Taking  $\text{Si}\cdots\text{O}(\text{OH})$  separation as the reaction coordinate, the search for transition state in such an arrangement has been unsuccessful. The energy plot versus  $d(\text{H}\cdots\text{Si})$  or  $d(\text{Si}\cdots\text{O}(\text{OH}))$  goes uphill, till to obtain the dissociative neutral rhenium hydride species (*1Htrans*) and the solvated  $\text{Me}_3\text{SiOH}^+$  ion.

**Scan for *TS8trans***

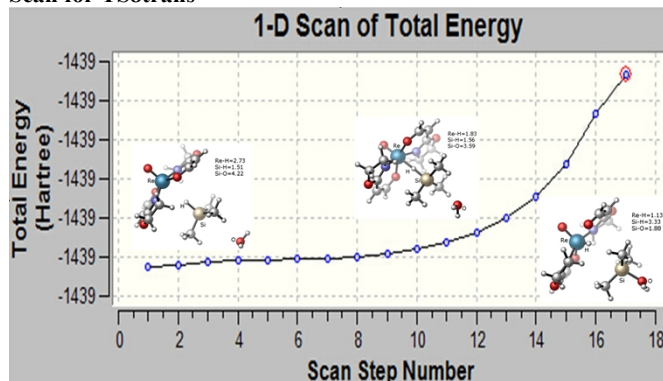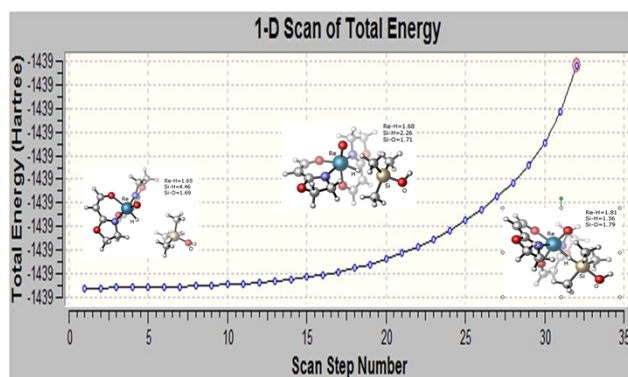



**Figure S8.** The energy plot versus  $d(\text{H}\cdots\text{Si})$  for searching the transition state TS9 and the rhenium(VII) intermediate 9 from complex *2trans* or *2cis* (note: Taking  $\text{H}\cdots\text{Si}$  separation as the reaction coordinate, the search for transition state in such an arrangement has been unsuccessful. The energy plot versus  $d(\text{H}\cdots\text{Si})$  goes uphill).

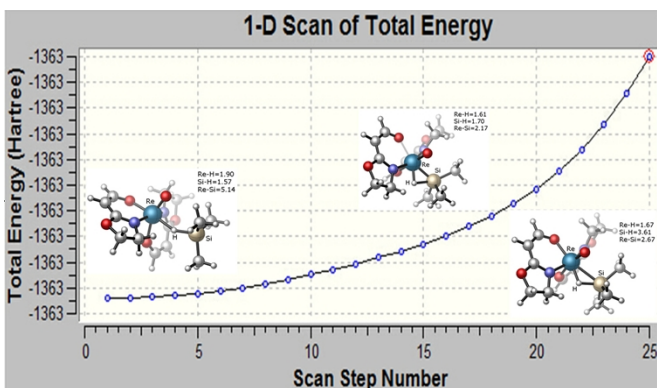

**Figure S9.** The energy plot versus  $d(\text{H}\cdots\text{Si})$  for searching the transition state TS10 and the rhenium(VII) intermediate 10-2 from silane-rhenium complex 10 (note: Taking  $\text{H}\cdots\text{Si}$  separation as the reaction coordinate, the search for transition state in such an arrangement has been unsuccessful. The energy plot versus  $d(\text{H}\cdots\text{Si})$  goes uphill).

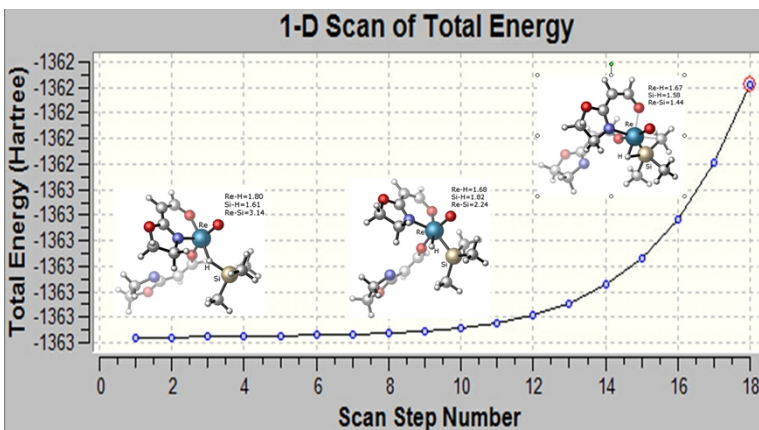

**Equation 1** Two reactions for the generation of 1Htrans/1Hcis and 1-OHtrans/1OH-cis with B (C<sub>6</sub>F<sub>5</sub>)<sub>4</sub><sup>-</sup>.

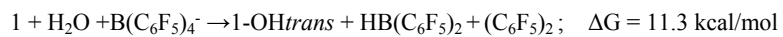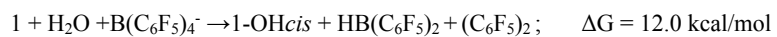

The reaction to generate the rhenium hydroxo complex (**1-OH**) with the cation B(C<sub>6</sub>F<sub>5</sub>)<sub>4</sub><sup>-</sup> under the experimental environment is calculated to be endergonic too.

**Table S2.** Cartesian coordinates for all optimized structures in XYZ format.

| <b>Optimized under solvent conditions</b> |                                             |           |           |            |           |           |           |
|-------------------------------------------|---------------------------------------------|-----------|-----------|------------|-----------|-----------|-----------|
| <b>1</b>                                  | <b>[Re(O)(hoz)<sub>2</sub>]<sup>+</sup></b> |           |           | H          | 1.922958  | -2.690695 | 0.098698  |
| Re                                        | 0.296861                                    | -0.151071 | 0.250688  | H          | 1.704684  | -2.531721 | -1.652991 |
| O                                         | -0.399832                                   | -0.176016 | 2.141266  | H          | 3.817052  | 0.690842  | -0.710722 |
| O                                         | 1.947518                                    | -0.171142 | 0.420922  | H          | 3.162124  | 3.005165  | -0.979333 |
| N                                         | -0.418747                                   | -2.041126 | 0.067553  | H          | -0.715066 | 4.764644  | 0.173221  |
| O                                         | 0.052078                                    | -0.117609 | -1.752635 | H          | -0.984969 | 4.826159  | -1.592174 |
| N                                         | -0.352693                                   | 1.763131  | 0.305852  | H          | -1.735351 | 2.533680  | -1.632516 |
| C                                         | -0.650258                                   | -1.229841 | 2.879594  | H          | -1.919457 | 2.688172  | 0.123146  |
| C                                         | -0.783834                                   | -2.514617 | 2.452895  | H          | 1.430097  | 1.517574  | -4.762072 |
| C                                         | -0.722844                                   | -2.853765 | 1.080279  | H          | -0.153771 | 2.282587  | -4.577975 |
| O                                         | -1.021507                                   | -4.087472 | 0.726741  | H          | 0.231071  | 1.392184  | -6.054592 |
| C                                         | -0.813529                                   | -4.224119 | -0.721440 | H          | -2.721729 | 0.484412  | -4.101219 |
| C                                         | -0.664126                                   | -2.781963 | -1.204210 | H          | -2.367555 | -0.370178 | -5.607215 |
| C                                         | -0.167959                                   | 0.925003  | -2.514841 | H          | -2.563847 | -1.277885 | -4.104224 |
| C                                         | -0.427876                                   | 2.200174  | -2.114003 | H          | 0.499081  | -1.789224 | -5.930831 |
| C                                         | -0.515345                                   | 2.562580  | -0.749315 | H          | 0.248548  | -2.618294 | -4.392522 |
| O                                         | -0.808625                                   | 3.812421  | -0.450152 | H          | 1.691606  | -1.619457 | -4.639319 |
| C                                         | -0.702119                                   | 3.979640  | 1.006538  |            |           |           |           |
| C                                         | -0.676222                                   | 2.546204  | 1.533246  |            |           |           |           |
| H                                         | -0.770257                                   | -0.998909 | 3.936892  | <b>TS2</b> |           |           |           |
| H                                         | -1.002123                                   | -3.300200 | 3.161504  | C          | 0.399968  | 1.312172  | -4.465186 |
| H                                         | 0.085988                                    | -4.824112 | -0.857190 | C          | 0.420639  | 0.253884  | -3.358753 |
| H                                         | -1.679665                                   | -4.743102 | -1.123879 | N          | 0.358191  | 1.073503  | -2.124690 |
| H                                         | 0.167781                                    | -2.654272 | -1.890384 | C          | 0.583166  | 2.333200  | -2.455550 |
| H                                         | -1.573646                                   | -2.402187 | -1.671385 | O          | 0.687263  | 2.564823  | -3.750946 |
| H                                         | -0.141022                                   | 0.695671  | -3.579040 | Re         | 0.094173  | 0.351319  | -0.228347 |
| H                                         | -0.595277                                   | 2.971977  | -2.851339 | O          | -1.569144 | 0.364774  | -0.087791 |
| H                                         | -1.559806                                   | 4.562436  | 1.331446  | C          | 0.759061  | 3.420366  | -1.556042 |
| H                                         | 0.222502                                    | 4.526504  | 1.192809  | C          | 0.836087  | 3.233097  | -0.216739 |
| H                                         | 0.086344                                    | 2.394731  | 2.292592  | O          | 0.719375  | 2.094580  | 0.445484  |
| H                                         | -1.640146                                   | 2.224295  | 1.927473  | N          | 0.632433  | -0.283558 | 1.649333  |
|                                           |                                             |           |           | C          | 1.347767  | -1.346815 | 1.974484  |
|                                           |                                             |           |           | O          | 1.495225  | -1.545452 | 3.277133  |
| <b>2trans</b>                             |                                             |           |           | C          | 0.661322  | -0.561458 | 3.978109  |
| Re                                        | 0.005838                                    | 0.002168  | 0.024002  | C          | 0.340590  | 0.470541  | 2.895500  |
| O                                         | 0.021510                                    | 0.008633  | 1.682210  | C          | 2.017765  | -2.210472 | 1.070202  |
| O                                         | 1.981505                                    | -0.070215 | -0.413587 | C          | 2.152748  | -1.876456 | -0.242555 |
| N                                         | -0.025865                                   | 1.958826  | -0.517365 | O          | 1.629199  | -0.826627 | -0.828540 |
| O                                         | -1.966220                                   | 0.076236  | -0.381199 | H          | -0.648345 | -1.888462 | -0.774785 |
| N                                         | 0.018209                                    | -1.958001 | -0.504340 | H          | 2.768694  | -2.491133 | -0.896514 |
| H                                         | -0.112715                                   | -0.114814 | -2.719409 | H          | 1.338820  | -0.335133 | -3.349631 |
| Si                                        | -0.315290                                   | -0.187225 | -4.209020 | H          | -0.577476 | 1.430851  | -4.932007 |
| C                                         | -2.760704                                   | -0.946462 | -0.584818 | H          | -0.435693 | -0.415972 | -3.409993 |
| C                                         | -2.411788                                   | -2.255464 | -0.729097 | H          | 0.982689  | 1.351092  | 2.943392  |
| C                                         | -1.065506                                   | -2.699220 | -0.713468 | H          | -0.701384 | 0.786123  | 2.915625  |
| O                                         | -0.824395                                   | -3.975224 | -0.950300 | H          | -0.221130 | -1.087737 | 4.343063  |
| C                                         | 0.613811                                    | -4.217947 | -0.768666 | H          | 1.243871  | -0.174875 | 4.810226  |
| C                                         | 1.216934                                    | -2.813033 | -0.718944 | H          | 1.169373  | 1.188594  | -5.222775 |
| C                                         | 2.763307                                    | 0.956979  | -0.638723 | H          | 1.032329  | 4.077251  | 0.440793  |
| C                                         | 2.400685                                    | 2.261428  | -0.793396 | H          | 0.894638  | 4.409771  | -1.968362 |
| C                                         | 1.053273                                    | 2.700634  | -0.752547 | H          | 2.528297  | -3.077130 | 1.465124  |
| O                                         | 0.804954                                    | 3.976080  | -0.985619 | Si         | -1.636816 | -3.032457 | -0.882599 |
| C                                         | -0.627944                                   | 4.217640  | -0.765447 | C          | -2.389254 | -3.281457 | 0.820942  |
| C                                         | -1.229459                                   | 2.812642  | -0.707712 | C          | -0.664491 | -4.537898 | -1.452979 |
| C                                         | 0.361448                                    | 1.398468  | -4.967009 | C          | -2.932894 | -2.529642 | -2.147669 |
| C                                         | -2.163577                                   | -0.353298 | -4.531072 | H          | -3.135471 | -4.083022 | 0.799051  |
| C                                         | 0.619311                                    | -1.693678 | -4.846186 | H          | -1.629250 | -3.555214 | 1.558972  |
| H                                         | -3.812722                                   | -0.671050 | -0.644553 | H          | -2.889104 | -2.372771 | 1.169826  |
| H                                         | -3.181116                                   | -2.995581 | -0.895847 | H          | -1.334072 | -5.392376 | -1.600506 |
| H                                         | 0.948778                                    | -4.821251 | -1.608492 | H          | -0.156232 | -4.348184 | -2.403634 |
| H                                         | 0.725499                                    | -4.770674 | 0.163947  | H          | 0.091086  | -4.830918 | -0.718107 |

|                                 |           |           |           |                               |           |           |           |
|---------------------------------|-----------|-----------|-----------|-------------------------------|-----------|-----------|-----------|
| H                               | -3.713044 | -3.295610 | -2.217146 | N                             | 2.192680  | 1.500354  | -0.629876 |
| H                               | -3.416882 | -1.587475 | -1.873844 | C                             | -2.145274 | 1.526439  | -3.370958 |
| H                               | -2.497827 | -2.411491 | -3.144938 | C                             | -2.343237 | 3.445873  | -0.745440 |
| <b>2cis</b>                     |           |           |           | C                             | 0.534812  | 2.728354  | 1.428625  |
| C                               | 0.314092  | 1.124133  | -4.536844 | C                             | 1.597689  | 3.357162  | 0.836985  |
| C                               | 0.193114  | 0.081936  | -3.420817 | C                             | 2.444584  | 2.655657  | -0.060751 |
| N                               | 0.236933  | 0.906876  | -2.191391 | O                             | 3.666879  | 3.150492  | -0.302832 |
| C                               | 0.607343  | 2.130094  | -2.529190 | C                             | 4.311320  | 2.268143  | -1.274057 |
| O                               | 0.733449  | 2.340215  | -3.829786 | C                             | 3.446868  | 1.005188  | -1.241730 |
| Re                              | -0.014857 | 0.203533  | -0.279485 | C                             | 1.326507  | -1.949321 | 1.328574  |
| O                               | -1.662663 | 0.412274  | -0.061856 | C                             | 0.060478  | -2.447717 | 1.490422  |
| C                               | 0.912469  | 3.199427  | -1.645620 | C                             | -1.091038 | -1.786666 | 1.004795  |
| C                               | 0.995767  | 3.021221  | -0.301673 | O                             | -2.278709 | -2.259871 | 1.382335  |
| O                               | 0.776112  | 1.914813  | 0.372651  | C                             | -3.314516 | -1.496493 | 0.687755  |
| N                               | 0.433204  | -0.463315 | 1.631402  | C                             | -2.559156 | -0.280096 | 0.151422  |
| C                               | 1.232709  | -1.443093 | 1.994798  | H                             | -2.034395 | 2.834121  | 0.100543  |
| O                               | 1.314029  | -1.647007 | 3.308403  | H                             | -3.428521 | 3.358908  | -0.854757 |
| C                               | 0.347436  | -0.756135 | 3.957277  | H                             | -2.106168 | 4.488479  | -0.508088 |
| C                               | -0.022510 | 0.239585  | 2.854548  | H                             | 0.361474  | 4.573610  | -2.229382 |
| C                               | 2.056322  | -2.215005 | 1.131902  | H                             | 0.139573  | 3.956117  | -3.874952 |
| C                               | 2.276660  | -1.822201 | -0.155544 | H                             | 0.961192  | 2.966016  | -2.664019 |
| O                               | 1.702997  | -0.807694 | -0.745893 | H                             | -2.134931 | 1.807318  | -4.429691 |
| H                               | -0.538805 | -1.534112 | -0.843417 | H                             | -1.531402 | 0.632129  | -3.263023 |
| H                               | 3.014367  | -2.348646 | -0.760134 | H                             | -3.176350 | 1.284285  | -3.099983 |
| H                               | 1.026689  | -0.623004 | -3.406562 | H                             | 1.902242  | 4.338541  | 1.171266  |
| H                               | -0.634535 | 1.348726  | -5.023883 | H                             | 4.290404  | 2.771119  | -2.242408 |
| H                               | -0.743700 | -0.470634 | -3.469853 | H                             | 5.339155  | 2.116309  | -0.952688 |
| H                               | 0.504846  | 1.191169  | 2.943155  | H                             | 3.254348  | 0.603730  | -2.236598 |
| H                               | -1.094126 | 0.430588  | 2.805582  | H                             | 3.869320  | 0.214680  | -0.617147 |
| H                               | -0.495600 | -1.368696 | 4.278449  | H                             | 2.153425  | -2.494813 | 1.789049  |
| H                               | 0.838983  | -0.309710 | 4.817857  | H                             | -0.085892 | -3.348608 | 2.068931  |
| H                               | 1.076062  | 0.901851  | -5.279873 | H                             | -3.715439 | -2.133971 | -0.101558 |
| H                               | 1.291174  | 3.855140  | 0.333145  | H                             | -4.092253 | -1.262672 | 1.411048  |
| H                               | 1.146891  | 4.162772  | -2.074629 | H                             | -2.702095 | 0.608465  | 0.770826  |
| H                               | 2.617692  | -3.036845 | 1.552573  | H                             | -2.827691 | -0.044676 | -0.876600 |
| Si                              | -1.517097 | -2.761157 | -0.833978 | H                             | -0.003195 | 3.246757  | 2.224766  |
| C                               | -1.980763 | -3.096273 | 0.943107  | <b>4anti (H<sub>2</sub>O)</b> |           |           |           |
| C                               | -0.474885 | -4.100577 | -1.620079 | Re                            | 0.452036  | 0.160631  | -0.091547 |
| C                               | -2.959861 | -2.228189 | -1.893865 | O                             | 0.187500  | -0.134664 | -1.721822 |
| H                               | -2.644971 | -3.967186 | 0.980739  | O                             | 1.841665  | -1.202338 | 0.750736  |
| H                               | -1.105171 | -3.318302 | 1.557898  | N                             | -1.028604 | -1.004324 | 0.734947  |
| H                               | -2.515682 | -2.251165 | 1.383587  | O                             | 0.521537  | 0.988347  | 1.876751  |
| H                               | -1.090259 | -4.993080 | -1.781247 | H                             | -0.527548 | 1.492517  | -0.150249 |
| H                               | -0.084868 | -3.786204 | -2.592392 | Si                            | -1.828358 | 3.652849  | -3.232832 |
| H                               | 0.367582  | -4.385668 | -0.985128 | O                             | -2.619934 | 4.871924  | -4.414861 |
| H                               | -3.697039 | -3.038179 | -1.932384 | H                             | -2.683106 | 5.821833  | -4.198027 |
| H                               | -3.453574 | -1.343226 | -1.484882 | H                             | -2.535689 | 4.763367  | -5.381531 |
| H                               | -2.649702 | -2.012901 | -2.920032 | C                             | -0.022512 | 4.069831  | -3.279977 |
| <b>TS4anti (H<sub>2</sub>O)</b> |           |           |           | N                             | 2.138932  | 1.368295  | -0.331861 |
| Re                              | 0.464957  | 0.328296  | -0.513239 | C                             | -2.301494 | 2.059963  | -4.050126 |
| O                               | 0.542620  | -0.289418 | -2.069422 | C                             | -2.714789 | 4.090312  | -1.667046 |
| O                               | 1.679007  | -0.876129 | 0.696335  | C                             | 0.936793  | 2.161013  | 2.210174  |
| N                               | -1.144837 | -0.710155 | 0.233068  | C                             | 1.807280  | 2.950426  | 1.494942  |
| O                               | 0.122058  | 1.527074  | 1.169866  | C                             | 2.472180  | 2.438468  | 0.353135  |
| H                               | -0.492566 | 1.589873  | -1.123793 | O                             | 3.619883  | 3.020549  | -0.037027 |
| Si                              | -1.499540 | 2.939819  | -2.336575 | C                             | 4.074998  | 2.323001  | -1.236550 |
| O                               | -2.613202 | 4.269660  | -3.333628 | C                             | 3.262938  | 1.025509  | -1.229228 |
| H                               | -2.756128 | 5.149645  | -2.945287 | C                             | 1.569056  | -2.359654 | 1.251653  |
| H                               | -2.504545 | 4.375870  | -4.294098 | C                             | 0.332305  | -2.892176 | 1.524466  |
| C                               | 0.148300  | 3.675939  | -2.816786 | C                             | -0.871031 | -2.180255 | 1.323619  |
|                                 |           |           |           | O                             | -1.997655 | -2.714238 | 1.806560  |

|   |           |           |           |
|---|-----------|-----------|-----------|
| C | -3.113065 | -1.875680 | 1.371382  |
| C | -2.430635 | -0.577489 | 0.941729  |
| H | -2.340541 | 3.452673  | -0.858815 |
| H | -3.792451 | 3.928973  | -1.754559 |
| H | -2.534978 | 5.128530  | -1.372068 |
| H | 0.169890  | 5.088900  | -2.932488 |
| H | 0.393585  | 3.955204  | -4.285062 |
| H | 0.514927  | 3.384373  | -2.615487 |
| H | -1.903657 | 1.992479  | -5.067229 |
| H | -1.876234 | 1.227379  | -3.479371 |
| H | -3.386167 | 1.928548  | -4.085250 |
| H | 2.144881  | 3.890489  | 1.907730  |
| H | 3.849829  | 2.957331  | -2.096255 |
| H | 5.149863  | 2.180550  | -1.150284 |
| H | 2.894663  | 0.756120  | -2.219358 |
| H | 3.817251  | 0.178286  | -0.817128 |
| H | 2.444971  | -2.967603 | 1.495335  |
| H | 0.265907  | -3.872255 | 1.975201  |
| H | -3.606503 | -2.390384 | 0.544978  |
| H | -3.796706 | -1.772784 | 2.210917  |
| H | -2.465063 | 0.191807  | 1.717635  |
| H | -2.846691 | -0.170836 | 0.021150  |
| H | 0.589351  | 2.528018  | 3.180242  |

#### 1Hcis

|    |           |           |           |
|----|-----------|-----------|-----------|
| Re | 0.324602  | 1.117176  | -4.534589 |
| O  | 0.200013  | -0.020653 | -3.309847 |
| N  | 0.459843  | 2.781493  | -3.278988 |
| O  | -1.582267 | 1.925330  | -5.031795 |
| N  | 0.129267  | -0.087858 | -6.190065 |
| O  | 0.976248  | 2.545802  | -5.975764 |
| H  | 1.971192  | 0.978567  | -4.539888 |
| C  | -2.411120 | 1.438787  | -5.889904 |
| C  | -2.197264 | 0.425107  | -6.793910 |
| C  | -0.951158 | -0.223689 | -6.943037 |
| O  | -0.803397 | -1.054233 | -7.981334 |
| C  | 0.504635  | -1.696282 | -7.859466 |
| C  | 1.237570  | -0.816317 | -6.846847 |
| C  | 1.747469  | 3.559289  | -5.778270 |
| C  | 1.960490  | 4.196531  | -4.579017 |
| C  | 1.190211  | 3.859664  | -3.437412 |
| O  | 1.093123  | 4.756858  | -2.439349 |
| C  | 0.288103  | 4.146112  | -1.385433 |
| C  | -0.397331 | 2.972780  | -2.090721 |
| H  | 0.966126  | 3.822814  | -0.592906 |
| H  | -0.394838 | 4.903759  | -1.007296 |
| H  | -0.413778 | 2.068850  | -1.481745 |
| H  | -1.418387 | 3.203363  | -2.406555 |
| H  | -3.396442 | 1.914736  | -5.892942 |
| H  | -2.991314 | 0.145933  | -7.471930 |
| H  | 0.954461  | -1.719604 | -8.849550 |
| H  | 0.337602  | -2.712713 | -7.498595 |
| H  | 1.910754  | -0.099033 | -7.323477 |
| H  | 2.235245  | 3.963473  | -6.670031 |
| H  | 1.799282  | -1.395642 | -6.115702 |
| H  | 2.580994  | 5.080484  | -4.539511 |

#### SiMe<sub>3</sub>OH<sup>+</sup>

|    |          |           |           |
|----|----------|-----------|-----------|
| C  | 0.026389 | 0.000002  | -0.045212 |
| Si | 0.009149 | -0.000002 | 1.828322  |
| O  | 1.635504 | -0.000002 | 2.266073  |
| H  | 1.831312 | 0.000000  | 3.209620  |

|   |           |           |           |
|---|-----------|-----------|-----------|
| C | -0.849664 | -1.534234 | 2.493474  |
| C | -0.849666 | 1.534227  | 2.493480  |
| H | -0.833196 | -1.563128 | 3.588535  |
| H | -1.900119 | -1.557276 | 2.182260  |
| H | -0.374795 | -2.450547 | 2.127776  |
| H | -0.374800 | 2.450542  | 2.127783  |
| H | -1.900122 | 1.557268  | 2.182269  |
| H | -0.833196 | 1.563118  | 3.588541  |
| H | 0.537367  | 0.885137  | -0.437302 |
| H | 0.537370  | -0.885129 | -0.437305 |
| H | -0.993016 | 0.000001  | -0.445912 |

#### 4syn (H<sub>2</sub>O)

|    |           |           |           |
|----|-----------|-----------|-----------|
| Re | -1.686417 | -0.195569 | -0.310322 |
| O  | -3.202228 | -0.912498 | -0.272004 |
| N  | -0.613906 | -1.859516 | 0.352111  |
| O  | -1.145168 | 0.591746  | 1.582624  |
| N  | -2.193397 | 1.724658  | -0.847019 |
| O  | 0.273005  | 0.470827  | -0.828907 |
| H  | -1.486157 | -0.662680 | -1.887010 |
| Si | -1.921417 | -2.675896 | -6.252446 |
| C  | -0.417617 | -2.493265 | -5.184706 |
| O  | -3.219793 | -3.412726 | -5.126935 |
| C  | -2.794919 | -1.100701 | -6.700088 |
| C  | -1.771605 | -3.923845 | -7.613740 |
| C  | 1.272897  | -0.255388 | -1.192111 |
| C  | 1.450362  | -1.591805 | -0.918551 |
| C  | 0.575204  | -2.264938 | -0.029330 |
| O  | 1.013906  | -3.377507 | 0.584761  |
| C  | -0.075016 | -3.871397 | 1.423151  |
| C  | -1.034578 | -2.681327 | 1.507008  |
| C  | -1.421927 | 1.770353  | 2.027823  |
| C  | -1.955601 | 2.830288  | 1.335621  |
| C  | -2.240887 | 2.779281  | -0.046867 |
| O  | -2.565705 | 3.924011  | -0.656197 |
| C  | -2.932201 | 3.611420  | -2.036143 |
| C  | -2.383877 | 2.198082  | -2.235796 |
| H  | -3.182417 | -4.254585 | -4.634541 |
| H  | -3.883732 | -2.801317 | -4.754666 |
| H  | 2.068668  | 0.269632  | -1.728235 |
| H  | 2.366746  | -2.084933 | -1.210679 |
| H  | -0.515329 | -4.735398 | 0.921821  |
| H  | 0.351233  | -4.171862 | 2.377643  |
| H  | -2.079212 | -2.976639 | 1.406942  |
| H  | -0.918523 | -2.104975 | 2.428362  |
| H  | -1.180589 | 1.926327  | 3.082998  |
| H  | -2.105036 | 3.772469  | 1.843540  |
| H  | -4.020337 | 3.661172  | -2.105009 |
| H  | -2.481819 | 4.366039  | -2.677110 |
| H  | -1.423306 | 2.190903  | -2.757335 |
| H  | -3.079887 | 1.550324  | -2.767010 |
| H  | -0.027461 | -3.460704 | -4.858084 |
| H  | -0.611009 | -1.875035 | -4.304218 |
| H  | 0.368081  | -2.001978 | -5.770466 |
| H  | -2.971351 | -0.463409 | -5.828614 |
| H  | -2.171669 | -0.533048 | -7.399692 |
| H  | -3.750295 | -1.296342 | -7.195307 |
| H  | -2.721163 | -4.076961 | -8.132756 |
| H  | -1.047731 | -3.547616 | -8.346097 |
| H  | -1.401135 | -4.886994 | -7.253821 |

#### TS5 (H<sub>2</sub>O)





|   |          |          |           |
|---|----------|----------|-----------|
| H | 8.396325 | 1.501193 | 0.856245  |
| H | 6.977202 | 2.395736 | -0.973272 |
| H | 4.953452 | 1.152279 | -1.699498 |

**4anti (PhOH)**

|    |           |           |           |
|----|-----------|-----------|-----------|
| C  | 2.375162  | -2.870907 | 0.844172  |
| N  | 2.978775  | -1.691470 | 0.185497  |
| C  | 4.279690  | -1.908835 | 0.069206  |
| O  | 4.674222  | -3.130413 | 0.442019  |
| C  | 3.479364  | -3.922850 | 0.727311  |
| Re | 1.989653  | 0.067484  | -0.215906 |
| N  | 1.342544  | 2.051879  | -0.133860 |
| C  | 0.957302  | 2.736707  | 0.918666  |
| O  | 0.591480  | 4.004751  | 0.660346  |
| C  | 0.609108  | 4.175558  | -0.789753 |
| C  | 1.425081  | 2.978127  | -1.283187 |
| C  | 0.995515  | 2.304317  | 2.267646  |
| C  | 1.778334  | 1.235192  | 2.635980  |
| O  | 2.414781  | 0.447243  | 1.839990  |
| C  | 5.273721  | -1.000673 | -0.359148 |
| C  | 5.024352  | 0.332289  | -0.578378 |
| O  | 3.898569  | 0.955030  | -0.482726 |
| O  | 1.277457  | -0.313918 | -1.686502 |
| C  | -2.599191 | -1.761104 | -2.217812 |
| Si | -3.279653 | -0.778304 | -0.799110 |
| C  | -3.032374 | -1.509269 | 0.885834  |
| O  | -5.105082 | -1.012466 | -1.125267 |
| C  | -3.036420 | 1.055686  | -0.905976 |
| H  | 0.632986  | -0.422309 | 0.595941  |
| C  | -6.226514 | -0.632819 | -0.295087 |
| H  | -5.370217 | -1.559758 | -1.888290 |
| H  | -1.978232 | -1.391459 | 1.161969  |
| H  | -3.266906 | -2.576749 | 0.904503  |
| H  | -3.628337 | -1.000339 | 1.647924  |
| H  | -3.569405 | 1.589771  | -0.115315 |
| H  | -3.344447 | 1.452025  | -1.877070 |
| H  | -1.967735 | 1.264641  | -0.781767 |
| H  | -2.926922 | -1.368156 | -3.184826 |
| H  | -1.505699 | -1.697976 | -2.194679 |
| H  | -2.870021 | -2.818885 | -2.153259 |
| H  | 0.565015  | 2.944059  | 3.024956  |
| H  | -0.425069 | 4.154965  | -1.139559 |
| H  | 1.056795  | 5.143276  | -1.004798 |
| H  | 0.999196  | 2.519811  | -2.175964 |
| H  | 2.470856  | 3.227861  | -1.480185 |
| H  | 5.872819  | 0.965129  | -0.853953 |
| H  | 6.284727  | -1.371711 | -0.449515 |
| H  | 3.331623  | -4.604735 | -0.111765 |
| H  | 3.666474  | -4.486574 | 1.638569  |
| H  | 2.136884  | -2.624839 | 1.881992  |
| H  | 1.460660  | -3.165675 | 0.331289  |
| H  | 1.924355  | 1.047489  | 3.703604  |
| C  | -6.751977 | -1.577735 | 0.569268  |
| C  | -7.834809 | -1.198251 | 1.361544  |
| C  | -8.350886 | 0.094356  | 1.273308  |
| C  | -7.793935 | 1.017991  | 0.390014  |
| C  | -6.713687 | 0.656611  | -0.415206 |
| H  | -6.335092 | -2.575766 | 0.621150  |
| H  | -8.270055 | -1.915363 | 2.046980  |
| H  | -9.191465 | 0.381620  | 1.893837  |
| H  | -8.198306 | 2.020487  | 0.319531  |
| H  | -6.270982 | 1.353106  | -1.115609 |

**SiMe<sub>3</sub>O<sup>+</sup>Ph<sup>+</sup>**

|    |           |           |           |
|----|-----------|-----------|-----------|
| Si | 0.000325  | -0.010264 | 1.835998  |
| C  | -0.783998 | 1.557113  | 2.507971  |
| C  | -0.895325 | -1.519429 | 2.501376  |
| C  | 0.048077  | -0.009429 | -0.034039 |
| O  | 1.638386  | -0.065141 | 2.284858  |
| H  | -0.270493 | 2.453265  | 2.146130  |
| H  | -0.776480 | 1.581635  | 3.602215  |
| H  | -1.829424 | 1.622408  | 2.185880  |
| H  | -0.876055 | -1.557009 | 3.594943  |
| H  | -1.946728 | -1.498044 | 2.192994  |
| H  | -0.459386 | -2.448748 | 2.121612  |
| H  | -0.966960 | 0.008245  | -0.444944 |
| H  | 0.548143  | -0.902540 | -0.421536 |
| H  | 0.578993  | 0.867435  | -0.417554 |
| C  | 2.188333  | -0.038089 | 3.537531  |
| C  | 2.379757  | -1.226293 | 4.250487  |
| C  | 2.983863  | -1.193622 | 5.506261  |
| C  | 3.401459  | 0.016373  | 6.060525  |
| C  | 3.215299  | 1.198281  | 5.343382  |
| C  | 2.612108  | 1.176280  | 4.087224  |
| H  | 2.060249  | -2.164770 | 3.812001  |
| H  | 3.129133  | -2.119918 | 6.051872  |
| H  | 3.871713  | 0.037362  | 7.037068  |
| H  | 3.541149  | 2.144743  | 5.761504  |
| H  | 2.470049  | 2.090168  | 3.521781  |

**4syn (PhOH)**

|    |           |           |           |
|----|-----------|-----------|-----------|
| Re | -1.686417 | -0.195569 | -0.310322 |
| O  | -3.602726 | -1.101920 | -0.261880 |
| N  | -1.057154 | -2.068612 | 0.363143  |
| O  | -0.993811 | -0.293485 | -1.834739 |
| H  | -0.311873 | 0.509335  | 0.287993  |
| O  | -2.076619 | 0.074711  | 1.769832  |
| N  | -2.660052 | 1.610831  | -0.456263 |
| C  | -2.047035 | 2.931729  | -0.194434 |
| C  | -3.140787 | 3.903231  | -0.639331 |
| O  | -4.343609 | 3.073029  | -0.655746 |
| C  | -3.960626 | 1.792456  | -0.630183 |
| C  | -4.963972 | 0.805406  | -0.749731 |
| C  | -4.725480 | -0.531327 | -0.540736 |
| C  | -1.432150 | -0.442806 | 2.757721  |
| C  | -0.664690 | -1.583849 | 2.720776  |
| C  | -0.658719 | -2.407947 | 1.567281  |
| O  | -0.317086 | -3.701089 | 1.703112  |
| C  | -0.380015 | -4.310591 | 0.377547  |
| C  | -1.180066 | -3.299014 | -0.447492 |
| H  | -1.127857 | 3.045454  | -0.767485 |
| H  | -1.815240 | 3.020397  | 0.870066  |
| H  | -2.990270 | 4.281278  | -1.652091 |
| H  | -3.318198 | 4.729169  | 0.045858  |
| H  | -5.972969 | 1.138148  | -0.947787 |
| H  | -1.557252 | 0.061573  | 3.720155  |
| H  | -5.579650 | -1.211801 | -0.598306 |
| H  | -0.227141 | -1.969077 | 3.630953  |
| H  | -0.857630 | -5.282239 | 0.481500  |
| H  | 0.643704  | -4.433699 | 0.019010  |
| H  | -2.234564 | -3.568979 | -0.545957 |
| H  | -0.762636 | -3.145441 | -1.442806 |
| Si | 4.146489  | 2.243505  | 0.932341  |
| C  | 3.411846  | 3.855401  | 0.378519  |



|   |          |           |           |   |           |           |           |
|---|----------|-----------|-----------|---|-----------|-----------|-----------|
| C | 5.951996 | 2.285915  | 1.346211  | H | -4.369440 | 3.601287  | 0.838313  |
| C | 3.101436 | 1.227572  | 2.077148  | H | -2.346721 | 2.413641  | 1.430928  |
| O | 4.094703 | 1.330583  | -0.698414 | H | -1.715560 | 2.967113  | -0.134739 |
| H | 3.536776 | 0.242288  | 2.262987  | H | 0.648121  | 3.492652  | 1.491863  |
| H | 3.035592 | 1.745719  | 3.040988  | H | 0.462058  | 3.835084  | -0.244791 |
| H | 2.083833 | 1.098439  | 1.699423  | H | 1.419767  | 4.908104  | 0.776430  |
| H | 4.010717 | 4.321870  | -0.408895 | H | 2.849283  | 3.385639  | -2.197913 |
| H | 2.384216 | 3.740707  | 0.021366  | H | 3.911026  | 4.440444  | -1.258617 |
| H | 3.387833 | 4.547405  | 1.227442  | H | 4.228578  | 3.895930  | 1.894791  |
| H | 6.364367 | 1.286189  | 1.504148  | H | 4.789245  | 2.275534  | 1.477619  |
| H | 6.535111 | 2.795861  | 0.575228  | H | 3.420365  | 2.487211  | 2.589631  |
| H | 6.076558 | 2.843034  | 2.282155  | C | 3.708457  | -0.507854 | 0.532726  |
| C | 4.506704 | -0.028785 | -0.974129 | C | 4.545280  | -1.540087 | 0.109208  |
| H | 3.484459 | 1.672301  | -1.379627 | C | 4.631830  | -1.865319 | -1.244175 |
| C | 3.565256 | -1.038714 | -0.875000 | C | 3.876415  | -1.159540 | -2.180974 |
| C | 3.983562 | -2.339236 | -1.155052 | C | 3.038435  | -0.123118 | -1.771947 |
| C | 5.307897 | -2.591533 | -1.511451 | H | 3.630184  | -0.245935 | 1.580418  |
| C | 6.226082 | -1.546227 | -1.598444 | H | 5.127358  | -2.088429 | 0.840793  |
| C | 5.826786 | -0.236765 | -1.331403 | H | 5.286097  | -2.666355 | -1.568232 |
| H | 2.541799 | -0.821642 | -0.594440 | H | 3.939715  | -1.410283 | -3.233582 |
| H | 3.270493 | -3.152191 | -1.092912 | H | 2.446193  | 0.434951  | -2.486039 |
| H | 5.624116 | -3.605756 | -1.724872 |   |           |           |           |
| H | 7.253608 | -1.742267 | -1.880099 |   |           |           |           |
| H | 6.517987 | 0.592869  | -1.404960 |   |           |           |           |

#### TS5 (PhOH)

|    |           |           |           |
|----|-----------|-----------|-----------|
| Re | -1.154119 | -0.318727 | -0.222818 |
| O  | -0.537402 | -0.050074 | -1.757971 |
| O  | -2.590984 | -1.741419 | -0.479476 |
| N  | -2.663355 | 1.071027  | -0.162928 |
| O  | -1.406127 | -0.234831 | 1.835317  |
| N  | -0.002056 | -1.975555 | 0.274105  |
| H  | -0.027450 | 0.909736  | 0.353166  |
| H  | 0.930929  | 0.942553  | 0.158847  |
| O  | 2.128398  | 1.243158  | -0.001225 |
| C  | 2.972193  | 0.189143  | -0.418817 |
| Si | 2.718632  | 2.907545  | 0.239356  |
| C  | -3.850856 | -1.563850 | -0.767354 |
| C  | -4.537839 | -0.386028 | -0.791367 |
| C  | -3.940862 | 0.846467  | -0.426747 |
| O  | -4.733610 | 1.902701  | -0.288597 |
| H  | -3.876237 | 3.691429  | -0.876422 |
| C  | -3.897664 | 3.066846  | 0.017158  |
| C  | -2.538406 | 2.451597  | 0.356183  |
| C  | -0.594482 | -0.618240 | 2.776766  |
| C  | 0.406234  | -1.539442 | 2.638656  |
| C  | 0.550089  | -2.271166 | 1.429500  |
| O  | 1.222796  | -3.423747 | 1.455152  |
| C  | 1.226596  | -3.967575 | 0.095549  |
| C  | 0.167210  | -3.134642 | -0.632823 |
| C  | 1.158493  | 3.859287  | 0.597081  |
| C  | 3.544266  | 3.412175  | -1.353829 |
| H  | 4.403505  | 2.779235  | -1.591164 |
| C  | 3.897249  | 2.872707  | 1.684009  |
| H  | -0.783686 | -0.184303 | 3.759558  |
| H  | 0.985483  | -1.843892 | 3.498534  |
| H  | 2.229066  | -3.829445 | -0.309521 |
| H  | 0.991055  | -5.026965 | 0.165898  |
| H  | 0.501294  | -2.800989 | -1.615015 |
| H  | -0.786707 | -3.653948 | -0.739754 |
| H  | -4.385279 | -2.487419 | -0.992036 |
| H  | -5.592712 | -0.386474 | -1.025248 |

#### 5 (PhOH)

|    |           |           |           |
|----|-----------|-----------|-----------|
| Re | 1.822180  | 0.143125  | -0.099104 |
| O  | 0.472401  | -0.216218 | -0.994885 |
| N  | 1.530268  | 1.963606  | 0.741544  |
| O  | 3.005415  | 1.193768  | -1.342524 |
| N  | 3.115961  | -1.404526 | -0.286335 |
| O  | 1.472353  | -0.690207 | 1.707203  |
| C  | 0.913835  | -0.115035 | 2.745158  |
| C  | 0.640484  | 1.208199  | 2.908148  |
| C  | 0.983163  | 2.180978  | 1.937526  |
| Si | -4.428170 | -2.052533 | 0.688309  |
| C  | -3.202992 | -1.100371 | 1.745624  |
| C  | -3.799798 | -3.765090 | 0.274443  |
| C  | -6.097465 | -2.115938 | 1.543252  |
| O  | -4.573370 | -1.296297 | -0.825511 |
| C  | -4.938956 | -0.011230 | -1.119517 |
| C  | -6.289816 | 0.333443  | -1.233877 |
| C  | -6.647661 | 1.634179  | -1.584622 |
| C  | -5.668802 | 2.598479  | -1.824629 |
| C  | -4.322725 | 2.248863  | -1.716101 |
| C  | -3.954282 | 0.951269  | -1.365515 |
| O  | 0.773982  | 3.450542  | 2.224711  |
| C  | 1.094302  | 4.254980  | 1.036709  |
| C  | 1.862599  | 3.285835  | 0.139238  |
| C  | 3.937206  | 0.728807  | -2.140256 |
| C  | 4.464770  | -0.524857 | -2.145333 |
| C  | 4.068701  | -1.513275 | -1.211837 |
| O  | 4.705538  | -2.667011 | -1.215061 |
| C  | 4.056133  | -3.562500 | -0.246856 |
| C  | 3.155205  | -2.629760 | 0.562433  |
| H  | 4.843775  | -4.038041 | 0.331821  |
| H  | 3.506680  | -4.305939 | -0.823930 |
| H  | 3.575412  | -2.383197 | 1.537467  |
| H  | 2.154165  | -3.030553 | 0.698194  |
| H  | 0.670167  | -0.812355 | 3.545192  |
| H  | 0.180080  | 1.550914  | 3.823480  |
| H  | 0.145144  | 4.580103  | 0.611021  |
| H  | 1.672322  | 5.112016  | 1.372306  |
| H  | 1.535306  | 3.327434  | -0.896038 |
| H  | 2.940705  | 3.442305  | 0.178312  |

|                                   |           |           |           |                                                 |           |           |           |
|-----------------------------------|-----------|-----------|-----------|-------------------------------------------------|-----------|-----------|-----------|
| H                                 | 4.306530  | 1.468715  | -2.848855 | H                                               | 0.134688  | -4.432741 | 0.577453  |
| H                                 | 5.241219  | -0.778331 | -2.852323 | C                                               | -1.190406 | -5.827281 | 1.595778  |
| H                                 | -2.216990 | -1.044489 | 1.273976  | H                                               | 0.909963  | -5.931587 | 1.015401  |
| H                                 | -3.544493 | -0.078219 | 1.937664  | H                                               | -1.542381 | -6.301151 | 0.675573  |
| H                                 | -3.081003 | -1.593027 | 2.716849  | H                                               | -1.162149 | -6.597241 | 2.371818  |
| H                                 | -2.837731 | -3.720533 | -0.245240 | H                                               | -1.936453 | -5.084274 | 1.888797  |
| H                                 | -3.661048 | -4.356144 | 1.186057  |                                                 |           |           |           |
| H                                 | -4.504475 | -4.303917 | -0.366545 | <b>4anti (CH<sub>3</sub>OH)</b>                 |           |           |           |
| H                                 | -6.002814 | -2.624659 | 2.509315  | Re                                              | -0.021712 | 0.049161  | -0.014258 |
| H                                 | -6.836624 | -2.665125 | 0.951914  | O                                               | -0.069294 | 0.051692  | 1.662959  |
| H                                 | -6.494101 | -1.114804 | 1.738300  | O                                               | 1.961959  | -0.002061 | -0.762917 |
| H                                 | -7.046998 | -0.421453 | -1.055640 | N                                               | 0.007161  | 2.073577  | -0.380211 |
| H                                 | -7.697631 | 1.892181  | -1.672113 | O                                               | -0.491862 | -0.043812 | -2.097403 |
| H                                 | -5.951678 | 3.608254  | -2.099450 | H                                               | -1.672757 | -0.012611 | -0.083188 |
| H                                 | -3.552384 | 2.988344  | -1.907449 | N                                               | 0.084626  | -2.022224 | -0.254925 |
| H                                 | -2.910206 | 0.669550  | -1.289689 | Si                                              | -4.286203 | -1.218285 | 2.753147  |
|                                   |           |           |           | C                                               | -3.476020 | -2.866423 | 2.483510  |
| <b>TS4anti (CH<sub>3</sub>OH)</b> |           |           |           | C                                               | -3.379749 | -0.065974 | 3.890222  |
| Re                                | -0.038956 | -0.020121 | -0.001021 | C                                               | -5.034460 | -0.447399 | 1.242282  |
| O                                 | -0.033041 | -0.058987 | 1.676390  | C                                               | -0.494399 | -2.760104 | -1.174723 |
| N                                 | 2.033745  | -0.046363 | -0.251006 | C                                               | 2.721611  | 1.017027  | -0.984582 |
| O                                 | 0.141649  | 1.956871  | -0.748983 | C                                               | 2.376793  | 2.346834  | -0.970712 |
| N                                 | -2.056952 | 0.139197  | -0.367031 | C                                               | 1.056336  | 2.794818  | -0.744652 |
| O                                 | 0.018501  | -0.503177 | -2.081318 | O                                               | 0.794908  | 4.089875  | -0.950249 |
| H                                 | -0.084868 | -1.673059 | -0.059288 | C                                               | -0.583558 | 4.339967  | -0.532969 |
| C                                 | 0.918042  | -1.191599 | -2.693816 | C                                               | -1.190508 | 2.938993  | -0.465182 |
| C                                 | 2.215571  | -1.387275 | -2.280357 | C                                               | -1.122676 | -0.987186 | -2.705964 |
| C                                 | 2.731777  | -0.672878 | -1.170788 | C                                               | -1.237344 | -2.292699 | -2.287008 |
| O                                 | 4.063151  | -0.511006 | -1.072135 | O                                               | -0.249686 | -4.078510 | -1.073603 |
| C                                 | 4.320700  | 0.228372  | 0.160716  | C                                               | 0.506105  | -4.287520 | 0.158275  |
| C                                 | 2.954125  | 0.817172  | 0.518943  | C                                               | 1.001307  | -2.885020 | 0.520478  |
| C                                 | -0.826456 | 2.781068  | -0.968466 | O                                               | -5.765605 | -1.599482 | 3.792455  |
| C                                 | -2.175594 | 2.522190  | -0.955205 | H                                               | -0.177891 | -4.699629 | 0.902871  |
| C                                 | -2.708142 | 1.232595  | -0.733188 | H                                               | 1.298017  | -5.001935 | -0.055188 |
| O                                 | -4.015854 | 1.054547  | -0.945247 | H                                               | 0.916953  | -2.673407 | 1.586636  |
| C                                 | -4.356275 | -0.308098 | -0.538785 | H                                               | 2.032088  | -2.702527 | 0.205826  |
| C                                 | -2.996125 | -1.001032 | -0.452542 | H                                               | 3.758675  | 0.767327  | -1.226173 |
| Si                                | 0.946611  | -4.313132 | 2.835901  | H                                               | 3.124900  | 3.090042  | -1.207551 |
| O                                 | 1.261601  | -5.760898 | 3.984703  | H                                               | -0.546514 | 4.834762  | 0.439227  |
| H                                 | 1.375308  | -5.631921 | 4.945336  | H                                               | -1.038607 | 4.996584  | -1.270923 |
| H                                 | 1.766508  | -6.545399 | 3.697538  | H                                               | -1.759676 | 2.683812  | -1.362917 |
| C                                 | 2.627083  | -3.592386 | 2.524570  | H                                               | -1.825891 | 2.799900  | 0.408243  |
| C                                 | -0.172731 | -3.304975 | 3.915143  | H                                               | -1.563699 | -0.716797 | -3.669772 |
| C                                 | 0.189678  | -5.185771 | 1.374879  | H                                               | -1.730326 | -3.019057 | -2.917455 |
| H                                 | 4.681422  | -0.483312 | 0.906129  | H                                               | -3.125220 | -0.546844 | 4.839667  |
| H                                 | 5.088255  | 0.969520  | -0.050464 | H                                               | -2.439389 | 0.233719  | 3.414940  |
| H                                 | 2.736208  | 0.754130  | 1.585136  | H                                               | -3.953764 | 0.841835  | 4.096438  |
| H                                 | 2.840551  | 1.855519  | 0.196922  | H                                               | -2.564441 | -2.716514 | 1.894694  |
| H                                 | -0.510975 | 3.800485  | -1.208197 | H                                               | -4.116657 | -3.556197 | 1.926977  |
| H                                 | -2.869274 | 3.316510  | -1.191395 | H                                               | -3.190329 | -3.335691 | 3.429217  |
| H                                 | -4.864943 | -0.244245 | 0.424878  | H                                               | -4.231061 | -0.158579 | 0.555814  |
| H                                 | -5.027597 | -0.718651 | -1.289715 | H                                               | -5.605188 | 0.450780  | 1.493519  |
| H                                 | -2.768373 | -1.592393 | -1.343143 | H                                               | -5.688637 | -1.140607 | 0.705939  |
| H                                 | -2.904515 | -1.636565 | 0.426983  | H                                               | -5.728130 | -1.351619 | 4.733367  |
| H                                 | 0.615938  | -1.615193 | -3.655929 | C                                               | -6.764499 | -2.662539 | 3.549681  |
| H                                 | 2.906973  | -1.926033 | -2.912773 | H                                               | -7.682494 | -2.355922 | 4.044436  |
| H                                 | 3.285859  | -4.301127 | 2.014692  | H                                               | -6.910640 | -2.711737 | 2.474753  |
| H                                 | 3.108526  | -3.265685 | 3.450584  | H                                               | -6.383989 | -3.601347 | 3.946027  |
| H                                 | 2.517418  | -2.714901 | 1.877729  |                                                 |           |           |           |
| H                                 | 0.343414  | -2.955091 | 4.814351  | <b>TS4anti (CH<sub>3</sub>CH<sub>2</sub>OH)</b> |           |           |           |
| H                                 | -0.497445 | -2.417788 | 3.360882  | C                                               | 1.112139  | 3.150295  | -1.085107 |
| H                                 | -1.064266 | -3.860733 | 4.216465  | N                                               | 0.626412  | 2.158691  | -0.097263 |

|                                               |           |           |           |                         |           |           |           |
|-----------------------------------------------|-----------|-----------|-----------|-------------------------|-----------|-----------|-----------|
| C                                             | 0.110478  | 2.811200  | 0.919661  | O                       | 0.117322  | -0.437866 | -1.324213 |
| O                                             | 0.016421  | 4.132667  | 0.754019  | O                       | 3.045046  | 0.715027  | -1.041403 |
| C                                             | 0.426252  | 4.437437  | -0.618245 | C                       | 4.055078  | -0.015075 | -1.375025 |
| Re                                            | 0.987872  | 0.118197  | -0.290793 | C                       | 4.275017  | -1.338503 | -1.079139 |
| O                                             | 0.813751  | 0.178245  | 1.760563  | C                       | 3.395661  | -2.102701 | -0.280097 |
| C                                             | 0.164982  | 1.005578  | 2.530521  | N                       | 2.199977  | -1.754112 | 0.169996  |
| C                                             | -0.252647 | 2.256472  | 2.176144  | C                       | 1.746810  | -2.796455 | 1.117655  |
| O                                             | 0.574764  | -0.008219 | -1.909934 | C                       | 2.702576  | -3.953953 | 0.825516  |
| O                                             | 2.930150  | 0.715750  | -0.330258 | O                       | 3.807333  | -3.311123 | 0.116163  |
| C                                             | 3.996440  | -0.036200 | -0.379710 | C                       | -3.309670 | -1.601776 | -1.597986 |
| C                                             | 4.063979  | -1.389932 | -0.235374 | Si                      | -3.985985 | -0.645190 | -0.159519 |
| C                                             | 2.925543  | -2.177981 | 0.067526  | O                       | -5.794880 | -0.876554 | -0.430878 |
| N                                             | 1.662761  | -1.780017 | 0.111521  | C                       | -6.900184 | -0.235205 | 0.359268  |
| C                                             | 0.859809  | -2.888706 | 0.678472  | C                       | -3.724861 | 1.191717  | -0.238308 |
| C                                             | 1.810446  | -4.080825 | 0.570203  | C                       | -3.718107 | -1.406779 | 1.510997  |
| O                                             | 3.121438  | -3.451856 | 0.385224  | H                       | 0.137598  | -0.248546 | 1.038690  |
| C                                             | -2.217738 | -1.909714 | -1.535840 | H                       | -1.131293 | 4.171379  | -0.923334 |
| Si                                            | -2.355584 | -0.538834 | -0.261498 | H                       | 0.373380  | 5.056221  | -1.303083 |
| O                                             | -4.754916 | -1.028899 | -0.535904 | H                       | -0.109274 | 2.335204  | -2.089155 |
| C                                             | -5.863389 | -0.312516 | 0.057829  | H                       | 1.524613  | 2.999838  | -1.891110 |
| C                                             | -2.792061 | 1.176494  | -0.882883 | H                       | 4.825218  | 0.507819  | -1.949180 |
| C                                             | -2.679547 | -1.008078 | 1.526430  | H                       | 5.191892  | -1.808432 | -1.405373 |
| H                                             | -0.735741 | -0.286283 | 0.016284  | H                       | 2.274927  | -4.701629 | 0.155366  |
| H                                             | -0.475809 | 4.670221  | -1.185570 | H                       | 3.113795  | -4.435779 | 1.709808  |
| H                                             | 1.080622  | 5.305055  | -0.581028 | H                       | 1.839738  | -2.422008 | 2.140168  |
| H                                             | 0.816187  | 2.858667  | -2.092773 | H                       | 0.705805  | -3.055303 | 0.929437  |
| H                                             | 2.201373  | 3.205699  | -1.038402 | H                       | 2.295605  | 1.426881  | 3.474306  |
| H                                             | 4.918624  | 0.522213  | -0.541752 | H                       | 0.890878  | 3.337799  | 2.953585  |
| H                                             | 5.023384  | -1.884844 | -0.277944 | H                       | -3.693901 | -1.230396 | -2.553245 |
| H                                             | 1.623385  | -4.699275 | -0.308424 | H                       | -2.220850 | -1.482957 | -1.620012 |
| H                                             | 1.866425  | -4.699124 | 1.462669  | H                       | -3.533912 | -2.669268 | -1.519870 |
| H                                             | 0.602062  | -2.647833 | 1.712374  | H                       | -2.657415 | 1.401887  | -0.110822 |
| H                                             | -0.052254 | -3.036872 | 0.104702  | H                       | -4.261032 | 1.717402  | 0.556764  |
| H                                             | -0.003200 | 0.654758  | 3.548875  | H                       | -4.034612 | 1.602966  | -1.203386 |
| H                                             | -0.732403 | 2.895549  | 2.903518  | H                       | -2.645799 | -1.395282 | 1.735555  |
| H                                             | -2.719744 | -1.618042 | -2.463281 | H                       | -4.054144 | -2.446948 | 1.533416  |
| H                                             | -1.179277 | -2.131843 | -1.785608 | H                       | -4.223487 | -0.854813 | 2.307938  |
| H                                             | -2.690709 | -2.824320 | -1.168789 | H                       | -6.074863 | -1.030298 | -1.352084 |
| H                                             | -1.918934 | 1.676647  | -1.305669 | C                       | -8.165776 | -1.029860 | 0.178412  |
| H                                             | -3.180587 | 1.799491  | -0.072540 | H                       | -6.537086 | -0.251099 | 1.384232  |
| H                                             | -3.556251 | 1.118592  | -1.661070 | H                       | -6.981107 | 0.790582  | 0.002952  |
| H                                             | -1.835304 | -1.567726 | 1.936274  | H                       | -8.953385 | -0.553845 | 0.768978  |
| H                                             | -3.571173 | -1.632297 | 1.604990  | H                       | -8.490089 | -1.034248 | -0.865980 |
| H                                             | -2.820990 | -0.118493 | 2.145712  | H                       | -8.045378 | -2.057201 | 0.527278  |
| H                                             | -4.990792 | -1.256477 | -1.445966 |                         |           |           |           |
| C                                             | -7.096494 | -1.190016 | 0.169991  | <b>TS4anti (t-BuOH)</b> |           |           |           |
| H                                             | -5.512971 | -0.003937 | 1.043590  | Re                      | 1.334223  | 0.091971  | -0.316545 |
| H                                             | -6.072993 | 0.589573  | -0.526141 | O                       | 1.050383  | 0.034562  | -1.967481 |
| H                                             | -7.909116 | -0.633513 | 0.646619  | N                       | 1.086894  | 2.157767  | -0.115921 |
| H                                             | -7.443324 | -1.510303 | -0.817565 | C                       | 1.648817  | 3.119970  | -1.091070 |
| H                                             | -6.888918 | -2.079657 | 0.770152  | C                       | 1.033203  | 4.444886  | -0.631973 |
|                                               |           |           |           | O                       | 0.590922  | 4.164887  | 0.734258  |
| <b>4anti (CH<sub>3</sub>CH<sub>2</sub>OH)</b> |           |           |           | C                       | 0.596777  | 2.836031  | 0.893596  |
| C                                             | 0.559112  | 2.852057  | -1.400303 | C                       | 0.170686  | 2.302649  | 2.140362  |
| N                                             | 0.743941  | 2.061150  | -0.165202 | C                       | 0.496113  | 1.024883  | 2.497513  |
| C                                             | 0.687246  | 2.881160  | 0.859539  | O                       | 1.103028  | 0.158491  | 1.740033  |
| O                                             | 0.323979  | 4.139027  | 0.552668  | C                       | 0.930870  | -2.934991 | 0.502015  |
| C                                             | -0.041236 | 4.152914  | -0.861224 | N                       | 1.851941  | -1.858440 | 0.070781  |
| Re                                            | 1.237100  | 0.032388  | -0.165123 | O                       | 3.338424  | 0.567133  | -0.140834 |
| O                                             | 2.233347  | 0.595163  | 1.636211  | C                       | 4.342098  | -0.256661 | -0.115439 |
| C                                             | 1.873691  | 1.510059  | 2.468692  | C                       | 4.298843  | -1.620106 | -0.019731 |
| C                                             | 1.069787  | 2.591567  | 2.192628  | C                       | 3.087648  | -2.335350 | 0.133622  |

|    |           |           |           |    |           |           |           |
|----|-----------|-----------|-----------|----|-----------|-----------|-----------|
| O  | 3.168751  | -3.634178 | 0.411172  | O  | 0.932919  | -0.380305 | -1.634237 |
| C  | 1.811318  | -4.181486 | 0.422790  | H  | 0.489941  | -0.428073 | 0.698767  |
| H  | -0.370887 | -0.192285 | -0.119455 | Si | -3.774111 | -0.755887 | -0.337707 |
| Si | -2.165759 | -0.391524 | -0.346856 | C  | -3.222676 | -1.806810 | -1.772086 |
| O  | -4.300246 | -0.749565 | -0.585692 | H  | -3.655082 | 1.479264  | -1.401687 |
| C  | -5.616369 | -0.447550 | 0.052540  | C  | -3.460217 | -1.521316 | 1.326031  |
| C  | -5.953013 | -1.586947 | 1.012616  | C  | -3.269507 | 1.025898  | -0.484201 |
| C  | -5.470957 | 0.883045  | 0.777774  | O  | -5.584600 | -0.798666 | -0.618800 |
| C  | -6.632368 | -0.352122 | -1.084057 | H  | -5.848600 | -1.392602 | -1.343936 |
| C  | -1.957414 | -1.579488 | -1.787250 | C  | -6.863654 | -0.386802 | 0.183912  |
| C  | -2.239743 | -1.053703 | 1.408096  | C  | -6.475135 | 0.827560  | 1.002039  |
| C  | -2.354578 | 1.426094  | -0.753093 | C  | 1.080642  | 2.918676  | -1.346497 |
| H  | 1.732813  | -4.847908 | 1.278232  | H  | -2.376444 | -1.543855 | 1.489977  |
| H  | -3.283585 | 1.599987  | -1.298307 | H  | -3.824841 | -2.550575 | 1.375364  |
| H  | -4.418968 | -1.542228 | -1.129438 | H  | -3.900596 | -0.948708 | 2.145621  |
| H  | -1.243417 | -1.200686 | 1.825204  | H  | -3.585598 | 1.629585  | 0.368973  |
| H  | -2.763843 | -2.012400 | 1.423878  | H  | -2.175048 | 1.063637  | -0.527524 |
| H  | -2.780213 | -0.362485 | 2.059347  | H  | -3.521757 | -1.379907 | -2.733991 |
| H  | -2.358652 | 2.041336  | 0.149639  | H  | -2.128717 | -1.861221 | -1.767113 |
| H  | -1.524272 | 1.752795  | -1.381802 | H  | -3.602911 | -2.830625 | -1.706784 |
| H  | -2.665397 | -1.336811 | -2.585671 | H  | 0.583235  | 3.008557  | 3.017331  |
| H  | -0.956594 | -1.513706 | -2.214945 | H  | -0.769977 | 4.073525  | -1.085657 |
| H  | -2.132166 | -2.614921 | -1.479840 | H  | 0.700876  | 5.086254  | -1.104410 |
| H  | -0.279239 | 2.971114  | 2.860331  | H  | 0.590261  | 2.426837  | -2.186791 |
| H  | 0.152800  | 4.727907  | -1.210834 | H  | 2.102764  | 3.175642  | -1.636695 |
| H  | 1.736426  | 5.273330  | -0.588477 | H  | 5.570707  | 0.942607  | -1.242900 |
| H  | 1.354478  | 2.848717  | -2.104930 | H  | 6.026644  | -1.385545 | -0.834668 |
| H  | 2.738946  | 3.110627  | -1.025038 | H  | 3.117088  | -4.599178 | -0.169266 |
| H  | 5.318403  | 0.228795  | -0.163803 | H  | 2.148752  | -2.589005 | 1.919699  |
| H  | 5.221453  | -2.181750 | 0.011705  | H  | 1.300375  | -3.160533 | 0.467916  |
| H  | 1.679575  | -4.740546 | -0.504850 | H  | 2.017995  | 1.149632  | 3.637314  |
| H  | 0.586709  | -2.727551 | 1.518030  | H  | -7.362521 | 1.160394  | 1.545528  |
| H  | 0.070711  | -2.992932 | -0.160610 | H  | -5.707559 | 0.592350  | 1.741103  |
| H  | 0.281218  | 0.686172  | 3.511880  | H  | -6.139323 | 1.648010  | 0.366559  |
| H  | -6.421330 | 1.128538  | 1.257316  | C  | -7.885419 | -0.070105 | -0.893609 |
| H  | -4.707163 | 0.838053  | 1.556293  | H  | -8.824656 | 0.211400  | -0.412020 |
| H  | -5.225339 | 1.687536  | 0.082604  | H  | -7.556456 | 0.760186  | -1.521217 |
| H  | -7.622398 | -0.123009 | -0.682102 | H  | -8.084015 | -0.942307 | -1.523396 |
| H  | -6.353427 | 0.435849  | -1.787051 | C  | -7.236472 | -1.591820 | 1.027978  |
| H  | -6.704717 | -1.299083 | -1.628428 | H  | -8.148512 | -1.360926 | 1.584313  |
| H  | -6.938675 | -1.421548 | 1.455211  | H  | -7.435098 | -2.465607 | 0.402951  |
| H  | -5.980075 | -2.545650 | 0.485966  | H  | -6.450932 | -1.833523 | 1.745424  |
| H  | -5.222827 | -1.652579 | 1.821301  |    |           |           |           |

#### 4anti (t-BuOH)

|    |          |           |           |
|----|----------|-----------|-----------|
| Re | 1.765510 | 0.046795  | -0.242061 |
| N  | 2.797191 | -1.695528 | 0.119616  |
| C  | 4.082034 | -1.914123 | -0.115686 |
| C  | 5.027716 | -1.014106 | -0.655211 |
| C  | 4.753971 | 0.314125  | -0.876357 |
| O  | 3.640291 | 0.936933  | -0.687430 |
| O  | 2.360563 | 0.495033  | 1.758972  |
| N  | 1.107707 | 2.028097  | -0.166903 |
| C  | 0.288953 | 4.119650  | -0.823341 |
| C  | 0.800188 | 2.740317  | 0.892645  |
| C  | 1.782292 | 1.301535  | 2.580037  |
| O  | 0.393859 | 3.994833  | 0.627822  |
| C  | 0.957810 | 2.350667  | 2.246009  |
| C  | 2.267444 | -2.858017 | 0.866847  |
| H  | 3.623550 | -4.475278 | 1.539758  |
| O  | 4.513187 | -3.127579 | 0.243920  |
| C  | 3.349815 | -3.914929 | 0.648651  |

#### TS4anti (EtMe<sub>2</sub>SiH)

|    |           |           |           |
|----|-----------|-----------|-----------|
| Re | -0.024831 | 0.017964  | -0.020650 |
| O  | -0.040434 | -0.006465 | 1.655063  |
| O  | 1.988818  | -0.002409 | -0.589501 |
| N  | -0.011250 | 2.039082  | -0.380405 |
| O  | -0.526433 | -0.066833 | -2.046824 |
| N  | 0.151372  | -2.050092 | -0.284103 |
| H  | -1.729084 | -0.074805 | 0.022475  |
| Si | -3.647022 | -0.395551 | 0.665949  |
| O  | -5.603386 | -0.590713 | 1.162594  |
| C  | -3.241465 | -2.195724 | 0.969655  |
| C  | -3.383742 | 0.801782  | 2.077532  |
| C  | -4.155080 | 0.179999  | -1.055065 |
| H  | -6.172084 | -1.153331 | 0.609933  |
| H  | -5.839204 | -0.754071 | 2.091261  |
| C  | -0.316641 | -2.804656 | -1.249474 |
| C  | -1.025855 | -1.037640 | -2.747325 |
| C  | -1.020463 | -2.361716 | -2.400527 |
| O  | -0.005400 | -4.104973 | -1.152331 |





|   |           |           |           |
|---|-----------|-----------|-----------|
| H | -3.416994 | 1.423533  | 1.575814  |
| H | -2.215851 | -2.352920 | -3.749915 |
| H | -3.598510 | -1.513610 | -3.056185 |
| H | -2.041902 | -0.690790 | -3.188869 |

#### 4anti (Et<sub>3</sub>SiH)

|    |           |           |           |
|----|-----------|-----------|-----------|
| Re | 1.145524  | 0.097651  | -0.218957 |
| O  | 0.143859  | -0.370159 | -1.481519 |
| N  | 0.564598  | 2.101668  | -0.177344 |
| O  | 2.986312  | 0.893855  | -0.909753 |
| N  | 2.158773  | -1.660396 | 0.121892  |
| O  | 1.965514  | 0.619955  | 1.685358  |
| H  | -0.029929 | -0.282665 | 0.880915  |
| C  | 1.488176  | 1.475344  | 2.521211  |
| C  | 0.655258  | 2.529086  | 2.222178  |
| C  | 0.380120  | 2.867375  | 0.874160  |
| O  | -0.010047 | 4.122957  | 0.592871  |
| C  | -0.239046 | 4.195461  | -0.847672 |
| C  | 0.460126  | 2.945029  | -1.387175 |
| C  | 4.053390  | 0.223249  | -1.186206 |
| C  | 4.308973  | -1.101706 | -0.928175 |
| C  | 3.401569  | -1.938613 | -0.241367 |
| O  | 3.831620  | -3.147829 | 0.133127  |
| C  | 2.697411  | -3.869607 | 0.707623  |
| C  | 1.679583  | -2.763271 | 0.984517  |
| Si | -3.987183 | -0.758451 | -0.033120 |
| O  | -5.843205 | -1.067840 | 0.028985  |
| H  | -6.390108 | -1.035145 | -0.778675 |
| H  | -6.380369 | -0.796127 | 0.796863  |
| C  | -3.840604 | 1.097158  | -0.180579 |
| C  | -3.532282 | -1.733550 | -1.557345 |
| C  | -3.485569 | -1.480294 | 1.612220  |
| H  | -1.317918 | 4.181014  | -1.014729 |
| H  | 0.180763  | 5.133726  | -1.203455 |
| H  | -0.121238 | 2.438855  | -2.158108 |
| H  | 1.459461  | 3.151469  | -1.778889 |
| H  | 4.843159  | 0.803816  | -1.671303 |
| H  | 5.269947  | -1.517117 | -1.196221 |
| H  | 2.354187  | -4.587774 | -0.039397 |
| H  | 3.052383  | -4.391257 | 1.593524  |
| H  | 1.687019  | -2.437132 | 2.027708  |
| H  | 0.665245  | -3.049150 | 0.710129  |
| H  | 1.826087  | 1.365869  | 3.555732  |
| H  | 0.373935  | 3.229186  | 2.995929  |
| C  | -4.350613 | 1.918967  | 1.016644  |
| H  | -4.344646 | 1.409722  | -1.102414 |
| H  | -2.773599 | 1.297370  | -0.345375 |
| C  | -4.112978 | -1.244173 | -2.897192 |
| H  | -2.435587 | -1.707864 | -1.601341 |
| H  | -3.797519 | -2.782352 | -1.384992 |
| H  | -2.446377 | -1.164470 | 1.771761  |
| C  | -3.604979 | -3.007711 | 1.755579  |
| H  | -4.061087 | -0.975294 | 2.397657  |
| H  | -3.292132 | -3.321814 | 2.754995  |
| H  | -4.632593 | -3.352458 | 1.610052  |
| H  | -2.972283 | -3.530042 | 1.033614  |
| H  | -4.209401 | 2.987695  | 0.835092  |
| H  | -5.418172 | 1.759648  | 1.196252  |
| H  | -3.814313 | 1.668697  | 1.935062  |
| H  | -3.758265 | -1.875024 | -3.716241 |
| H  | -5.207003 | -1.281990 | -2.915116 |
| H  | -3.810623 | -0.217758 | -3.118509 |

#### TS4anti (PhMe<sub>2</sub>SiH)

|    |           |           |           |
|----|-----------|-----------|-----------|
| Re | -0.884210 | 0.353219  | -0.292105 |
| O  | -0.145372 | 0.257152  | -1.791494 |
| N  | -0.190181 | 2.161341  | 0.381706  |
| C  | 1.034745  | 2.373311  | 1.184848  |
| C  | 1.173452  | 3.894985  | 1.189359  |
| O  | -0.163962 | 4.356019  | 0.815019  |
| C  | -0.828339 | 3.321241  | 0.300978  |
| C  | -2.118187 | 3.565193  | -0.222706 |
| C  | -2.966499 | 2.559286  | -0.606716 |
| O  | -2.733481 | 1.286346  | -0.612444 |
| N  | -2.026604 | -1.394216 | -0.508226 |
| C  | -2.697487 | -1.740368 | -1.781751 |
| C  | -3.218858 | -3.152757 | -1.501584 |
| O  | -3.189643 | -3.247656 | -0.043325 |
| C  | -2.433387 | -2.236895 | 0.409887  |
| C  | -2.225862 | -2.125498 | 1.810576  |
| O  | -1.460487 | 0.118747  | 1.705807  |
| H  | 0.435467  | -0.502092 | 0.367555  |
| Si | 2.028774  | -1.770562 | 0.765848  |
| C  | 3.150697  | -0.709476 | -0.284561 |
| C  | 1.096767  | -3.149201 | -0.081527 |
| H  | 1.361021  | -2.183750 | 3.102833  |
| O  | 3.567700  | -2.960323 | 1.313915  |
| C  | -1.810652 | -0.943502 | 2.361718  |
| C  | 1.736206  | -1.315128 | 2.552287  |
| C  | 3.097353  | -0.769494 | -1.687004 |
| C  | 3.973508  | -0.017205 | -2.466805 |
| C  | 4.918642  | 0.807311  | -1.857986 |
| C  | 4.986304  | 0.878974  | -0.466830 |
| C  | 4.109686  | 0.127468  | 0.313176  |
| H  | 4.215517  | -3.201464 | 0.629719  |
| H  | 3.385874  | -3.754598 | 1.845876  |
| H  | 1.760635  | -3.685660 | -0.766021 |
| H  | 0.240868  | -2.785113 | -0.646983 |
| H  | 2.675138  | -1.001888 | 3.016959  |
| H  | 1.012594  | -0.508768 | 2.658622  |
| H  | 0.732658  | -3.864643 | 0.662463  |
| H  | -2.556691 | -2.934038 | 2.446638  |
| H  | -2.565243 | -3.932388 | -1.896801 |
| H  | -4.243239 | -3.324754 | -1.824133 |
| H  | -1.986571 | -1.711677 | -2.607557 |
| H  | -3.496398 | -1.021781 | -1.979239 |
| H  | -3.969759 | 2.836363  | -0.938803 |
| H  | -2.460660 | 4.589589  | -0.252758 |
| H  | 1.868263  | 4.263632  | 0.433055  |
| H  | 1.410270  | 4.326223  | 2.159077  |
| H  | 0.882724  | 1.965287  | 2.187653  |
| H  | 1.884003  | 1.876562  | 0.721486  |
| H  | -1.803595 | -0.845326 | 3.448994  |
| H  | 2.363961  | -1.398015 | -2.179207 |
| H  | 3.916751  | -0.073196 | -3.548186 |
| H  | 5.600426  | 1.392293  | -2.465386 |
| H  | 5.721001  | 1.518478  | 0.009876  |
| H  | 4.178837  | 0.195541  | 1.393951  |

#### 4anti (PhMe<sub>2</sub>SiH)

|    |           |           |           |
|----|-----------|-----------|-----------|
| Re | -1.290970 | 0.107102  | -0.253133 |
| O  | -0.370365 | 0.224805  | -1.649553 |
| H  | 0.043680  | -0.320936 | 0.625202  |
| O  | -3.350772 | 0.438486  | -0.637632 |

|    |           |           |           |    |           |           |           |
|----|-----------|-----------|-----------|----|-----------|-----------|-----------|
| C  | -3.951158 | 1.580232  | -0.643733 | C  | -1.129471 | -1.900234 | 1.889086  |
| C  | -3.459600 | 2.796124  | -0.234459 | O  | -1.218542 | -0.640045 | 1.587702  |
| C  | -2.171495 | 2.956229  | 0.322934  | C  | -3.218079 | 2.814743  | 1.132873  |
| O  | -1.871745 | 4.140731  | 0.865912  | C  | -1.819094 | 2.861219  | 1.328399  |
| C  | -0.461976 | 4.113055  | 1.252004  | O  | -1.333039 | 3.864594  | 2.058450  |
| C  | -0.121080 | 2.622987  | 1.237026  | C  | 0.127219  | 3.774409  | 2.040077  |
| N  | -1.208430 | 2.051772  | 0.411317  | C  | 0.385255  | 2.358465  | 1.527773  |
| O  | -2.024460 | -0.257695 | 1.719220  | N  | -0.906356 | 1.997965  | 0.900065  |
| C  | -1.833014 | -2.622840 | 1.846570  | H  | 0.368232  | -0.181886 | -0.185111 |
| C  | -1.965753 | -1.361834 | 2.379680  | Si | 2.215205  | -0.841456 | -0.898622 |
| N  | -1.807704 | -1.905497 | -0.484451 | C  | 2.404956  | -1.671907 | 0.767831  |
| C  | -2.268270 | -2.483856 | -1.764519 | C  | 1.375648  | -1.751375 | -2.293983 |
| C  | -2.245275 | -3.985417 | -1.466589 | C  | 2.736227  | 0.935822  | -1.165598 |
| C  | -1.920657 | -2.824551 | 0.446000  | O  | 4.070931  | -1.466025 | -1.431321 |
| Si | 3.782980  | -1.395453 | 0.646754  | C  | 3.810493  | 1.497254  | -0.450884 |
| O  | 5.522755  | -2.106924 | 0.653827  | C  | 4.232824  | 2.800466  | -0.705670 |
| C  | 3.508949  | -1.236882 | 2.470652  | C  | 3.596048  | 3.563195  | -1.684254 |
| H  | 6.076379  | -2.069113 | -0.149590 | C  | 2.537837  | 3.017838  | -2.409670 |
| H  | 5.756711  | -2.896785 | 1.178282  | C  | 2.111304  | 1.716319  | -2.152823 |
| C  | 4.079220  | 0.178878  | -0.289106 | C  | 2.631716  | -0.943923 | 1.947002  |
| C  | 2.777738  | -2.680458 | -0.229610 | C  | 2.833391  | -1.596502 | 3.161377  |
| H  | 3.159440  | -2.889432 | -1.232274 | C  | 2.811839  | -2.989544 | 3.219877  |
| H  | 1.744522  | -2.331178 | -0.323904 | C  | 2.583694  | -3.728115 | 2.060215  |
| H  | 4.207236  | -0.531596 | 2.928018  | C  | 2.379855  | -3.075278 | 0.845911  |
| H  | 3.606944  | -2.203457 | 2.974229  | C  | -3.855528 | 1.742894  | 0.563682  |
| H  | 2.491656  | -0.874231 | 2.650388  | H  | 4.477572  | -1.103723 | -2.237040 |
| O  | -2.252271 | -4.046479 | -0.007386 | H  | 4.313554  | -2.404857 | -1.358161 |
| H  | 2.762951  | -3.614827 | 0.339238  | H  | 1.764976  | -1.399077 | -3.253775 |
| H  | -1.865716 | -3.487596 | 2.494127  | H  | 0.295770  | -1.618125 | -2.288226 |
| H  | -1.332173 | -4.471611 | -1.815917 | H  | 1.587651  | -2.822389 | -2.221933 |
| H  | -3.117454 | -4.527285 | -1.825625 | H  | -1.360525 | -3.958444 | 1.406337  |
| H  | -1.593893 | -2.206370 | -2.574911 | H  | -2.220601 | -3.614594 | -2.949908 |
| H  | -3.269772 | -2.112660 | -1.997349 | H  | -3.923745 | -3.593429 | -2.413220 |
| H  | -4.981472 | 1.550860  | -1.009286 | H  | -2.385230 | -1.216209 | -2.932669 |
| H  | -4.100088 | 3.665760  | -0.273465 | H  | -3.801572 | -1.232415 | -1.863975 |
| H  | 0.092674  | 4.683800  | 0.504993  | H  | -4.946805 | 1.764882  | 0.514871  |
| H  | -0.377016 | 4.589531  | 2.226127  | H  | 0.492104  | 4.547965  | 1.362646  |
| H  | -0.148988 | 2.176056  | 2.234156  | H  | 0.480960  | 3.962794  | 3.051077  |
| H  | 0.847918  | 2.419194  | 0.784050  | H  | 0.599435  | 1.654071  | 2.335631  |
| H  | -2.079976 | -1.271171 | 3.463741  | H  | 1.188021  | 2.318723  | 0.795460  |
| C  | 3.680816  | 0.305803  | -1.631798 | H  | -0.851772 | -2.114718 | 2.921974  |
| C  | 3.896753  | 1.493141  | -2.327519 | H  | 1.277900  | 1.316320  | -2.717306 |
| C  | 4.513389  | 2.570437  | -1.693193 | H  | 2.042969  | 3.604498  | -3.175616 |
| C  | 4.911490  | 2.463861  | -0.360135 | H  | 3.925929  | 4.576835  | -1.883554 |
| C  | 4.693415  | 1.279551  | 0.337792  | H  | 5.060848  | 3.217849  | -0.143487 |
| H  | 3.191955  | -0.518972 | -2.138386 | H  | 4.328899  | 0.918122  | 0.305279  |
| H  | 3.581206  | 1.577944  | -3.361173 | H  | 2.190156  | -3.673308 | -0.039912 |
| H  | 4.681309  | 3.494272  | -2.235667 | H  | 2.559960  | -4.811496 | 2.099942  |
| H  | 5.387536  | 3.303124  | 0.134209  | H  | 2.970326  | -3.496846 | 4.165066  |
| H  | 5.002300  | 1.216267  | 1.376042  | H  | 3.008224  | -1.017704 | 4.061579  |
|    |           |           |           | H  | 2.652212  | 0.139259  | 1.924824  |

**TS4anti (Ph<sub>2</sub>MeSiH)**

|    |           |           |           |
|----|-----------|-----------|-----------|
| Re | -1.273344 | 0.333814  | -0.240342 |
| O  | -0.990458 | 0.915197  | -1.786891 |
| N  | -1.961234 | -1.549732 | -0.877942 |
| C  | -2.834112 | -1.698797 | -2.064381 |
| C  | -2.922367 | -3.219680 | -2.213018 |
| O  | -2.514554 | -3.717322 | -0.900916 |
| O  | -3.319628 | 0.670668  | 0.077449  |
| C  | -1.922853 | -2.701479 | -0.253984 |
| H  | -3.803846 | 3.637847  | 1.516540  |
| C  | -1.404840 | -2.940747 | 1.046554  |

**4anti (Ph<sub>2</sub>MeSiH)**

|    |          |           |           |
|----|----------|-----------|-----------|
| C  | 5.119602 | 1.329371  | -1.191429 |
| C  | 3.924751 | 0.615320  | -1.400114 |
| C  | 2.930370 | 1.191501  | -2.211488 |
| C  | 3.122484 | 2.444655  | -2.789537 |
| C  | 4.312221 | 3.137416  | -2.572911 |
| C  | 5.311419 | 2.578203  | -1.776167 |
| Si | 3.613665 | -1.045466 | -0.629145 |
| C  | 2.388104 | -2.117419 | -1.510329 |
| O  | 5.263796 | -1.868379 | -0.963066 |







|   |           |          |           |
|---|-----------|----------|-----------|
| H | -2.323866 | 1.620847 | -2.241087 |
| H | -3.580712 | 1.969900 | -1.044542 |
| H | -1.879132 | 2.034613 | -0.580763 |

**4anti (BuMe<sub>2</sub>SiH)**

|    |           |           |           |
|----|-----------|-----------|-----------|
| Re | 1.559087  | 0.122072  | -0.369095 |
| O  | 1.131728  | 0.041365  | -1.988343 |
| N  | 0.870913  | 2.066157  | -0.039075 |
| O  | 3.470161  | 1.006388  | -0.108203 |
| N  | 2.484045  | -1.699111 | -0.129203 |
| C  | 1.789106  | -2.967402 | 0.184703  |
| H  | 0.088833  | -0.489461 | 0.077643  |
| O  | 1.596904  | 0.112275  | 1.768763  |
| C  | 0.808451  | 0.747164  | 2.563799  |
| Si | -4.792771 | -0.214492 | -0.718541 |
| O  | -6.498165 | 0.562041  | -0.668865 |
| C  | -3.648302 | 1.246423  | -0.639447 |
| C  | -4.893033 | -1.031353 | -2.382667 |
| C  | -4.826525 | -1.343168 | 0.797491  |
| C  | 0.077213  | 1.872348  | 2.258647  |
| C  | 0.275748  | 2.546364  | 1.027645  |
| O  | -0.076789 | 3.841789  | 0.939453  |
| C  | 0.203232  | 4.274974  | -0.427053 |
| C  | 1.135144  | 3.186889  | -0.965880 |
| C  | 4.603517  | 0.390761  | -0.123465 |
| C  | 4.829231  | -0.964494 | -0.121127 |
| C  | 3.787850  | -1.916746 | -0.050484 |
| O  | 4.126481  | -3.193364 | 0.155250  |
| C  | 2.910851  | -4.001515 | 0.075220  |
| C  | -3.394844 | -1.901612 | 0.979900  |
| C  | -5.812257 | -2.508921 | 0.575793  |
| C  | -5.226496 | -0.552638 | 2.061391  |
| H  | 0.762953  | 0.367377  | 3.588626  |
| H  | -0.499099 | 2.365638  | 3.028479  |
| H  | -0.746768 | 4.319170  | -0.963749 |
| H  | 0.649761  | 5.265439  | -0.376533 |
| H  | 2.190860  | 3.465815  | -0.914104 |
| H  | 0.897253  | 2.900490  | -1.990369 |
| H  | 5.478062  | 1.047765  | -0.122323 |
| H  | 5.845485  | -1.331635 | -0.102931 |
| H  | 2.924007  | -4.517515 | -0.886294 |
| H  | 2.940379  | -4.724607 | 0.887551  |
| H  | 0.983868  | -3.146301 | -0.526467 |
| H  | 1.367199  | -2.910279 | 1.191213  |
| H  | -2.670325 | -1.112746 | 1.200339  |
| H  | -3.044778 | -2.448433 | 0.098476  |
| H  | -3.385785 | -2.602660 | 1.822164  |
| H  | -5.529145 | -3.127504 | -0.280563 |
| H  | -5.818635 | -3.155605 | 1.460579  |
| H  | -6.837420 | -2.159810 | 0.418237  |
| H  | -5.177802 | -1.213471 | 2.934030  |
| H  | -6.252103 | -0.171833 | 2.008718  |
| H  | -6.995837 | 0.739741  | -1.489150 |
| H  | -6.773062 | 1.189318  | 0.026166  |
| H  | -4.554892 | 0.288894  | 2.253320  |
| H  | -5.766274 | -1.682143 | -2.474115 |
| H  | -4.918545 | -0.289662 | -3.186463 |
| H  | -4.001300 | -1.647706 | -2.537037 |
| H  | -3.845619 | 1.936288  | -1.465394 |
| H  | -3.731672 | 1.794488  | 0.302524  |
| H  | -2.612954 | 0.902714  | -0.734197 |
